# Supplementary material
Source: PubMed Central journal article supplement (PMC6422090)
Supplement: supp_RA118.005723_140613_2_supp_263927_pl33yr.pdf [file supp_RA118.005723_140613_2_supp_263927_pl33yr.pdf]

# Oleuropein derivatives from olive fruit extracts reduce $\alpha$ -synuclein fibrillation and oligomer toxicity

Hossein Mohammad-Beigi, Farhang Aliakbari, Cagla Sahin, Charlotte Lomax, Ahmed Tawfike, Nicholas P. Schafer, Alireza Amiri-Nowdijeh, Hoda Eskandari, Ian Max Møller, Mehdi Hosseini-Mazinani, Gunna Christiansen, Jane L. Ward, Dina Morshedi, Daniel E. Otzen

## Supplementary Figures S1-14 and Tables S1-3

### Supplementary Figures

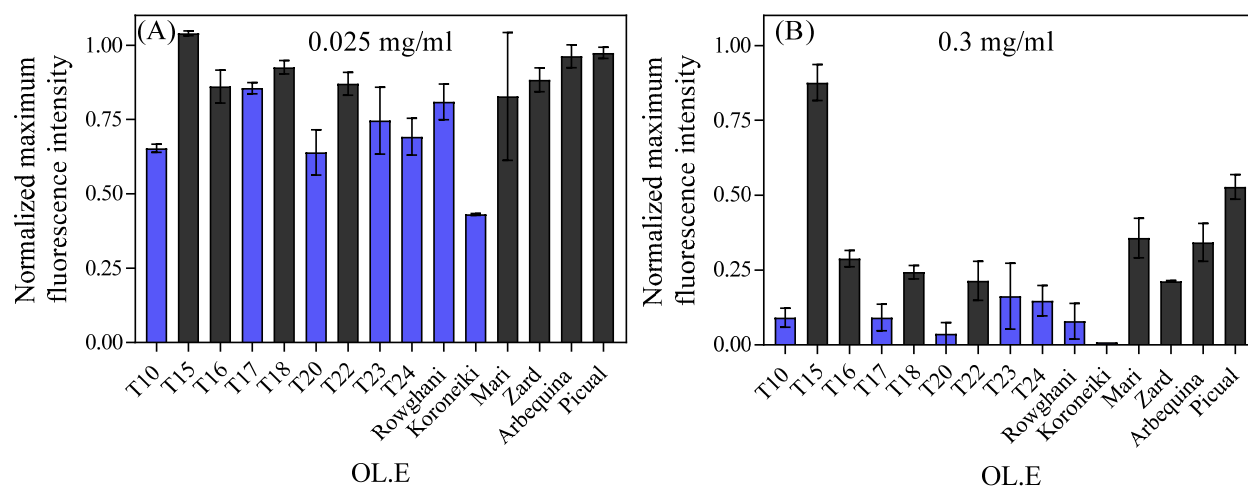

**Fig. S1.** The effect of different olive fruit extracts on  $\alpha$ SN fibrillation. First screening: Selection of the best extracts by the effect of (A) 0.025 mg/ml extract and (B) 0.3 mg/ml extract on the end-point ThT fluorescence level at 1 mg/ml  $\alpha$ SN.

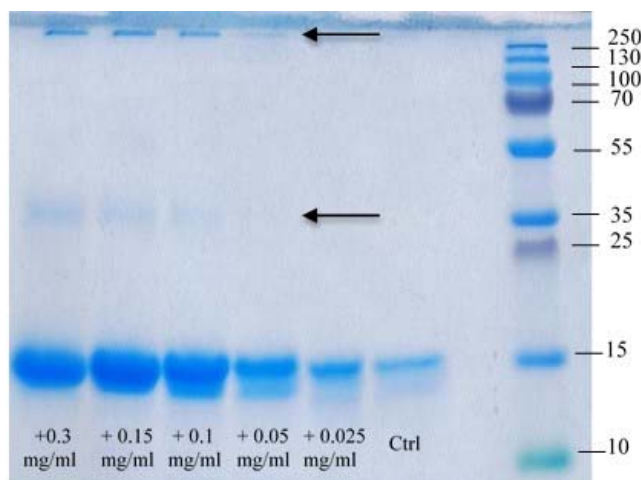

**Fig. S2.** SDS-PAGE analysis of the supernatants of samples of 1 mg/ml  $\alpha$ SN incubated for 24 h in the presence of 0-0.3 mg/ml of of Koroneiki extract. Arrows highlight dimers ( $\approx$ 35 kDa) and oligomers ( $>$  250 kDa).

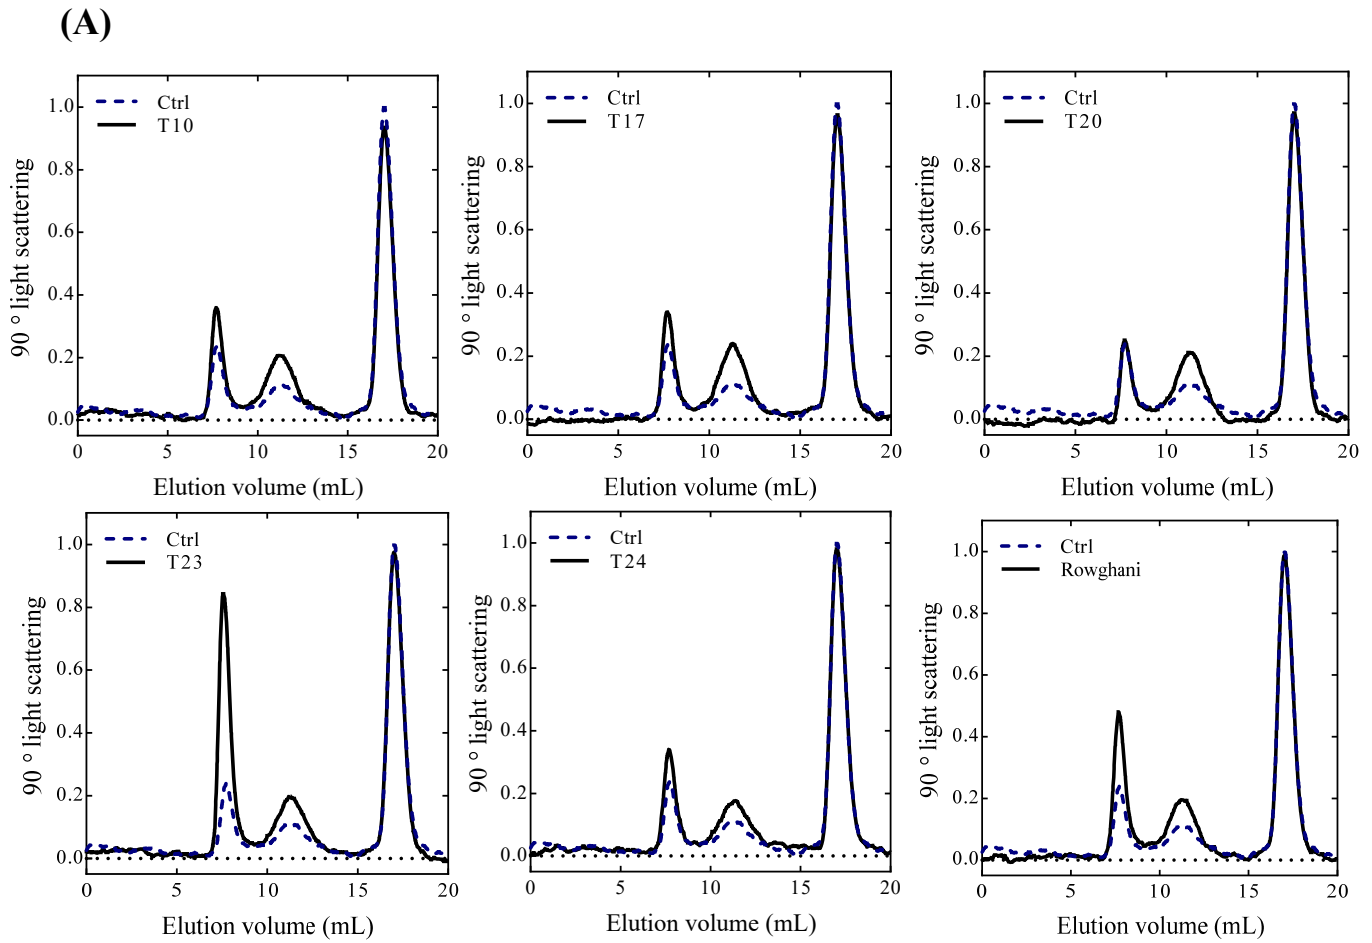

**(B)**

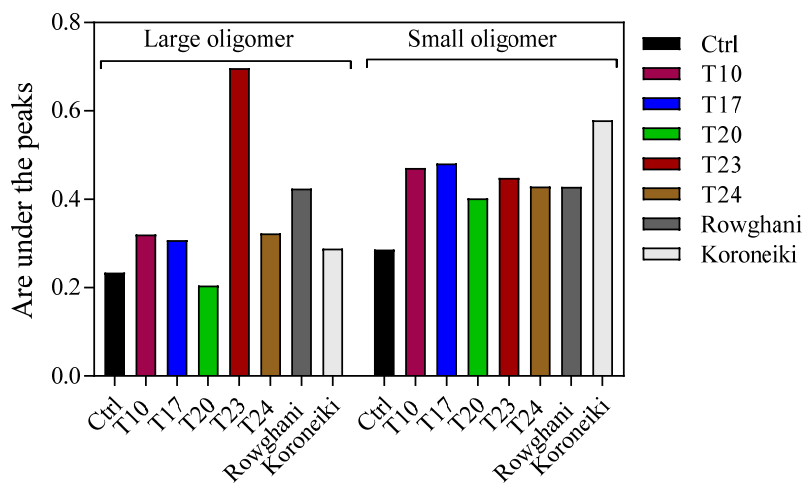

**Fig. S3.** Oligomerization assay. (A) SEC profile of the supernatants from solutions of 1 mg/ml  $\alpha$ SN incubated for 1 h at 37°C in the presence of different extracts. (B) Area under the peaks of small and large oligomers formed in the absence (Ctrl) and presence of 0.15 mg/ml of the best extracts.

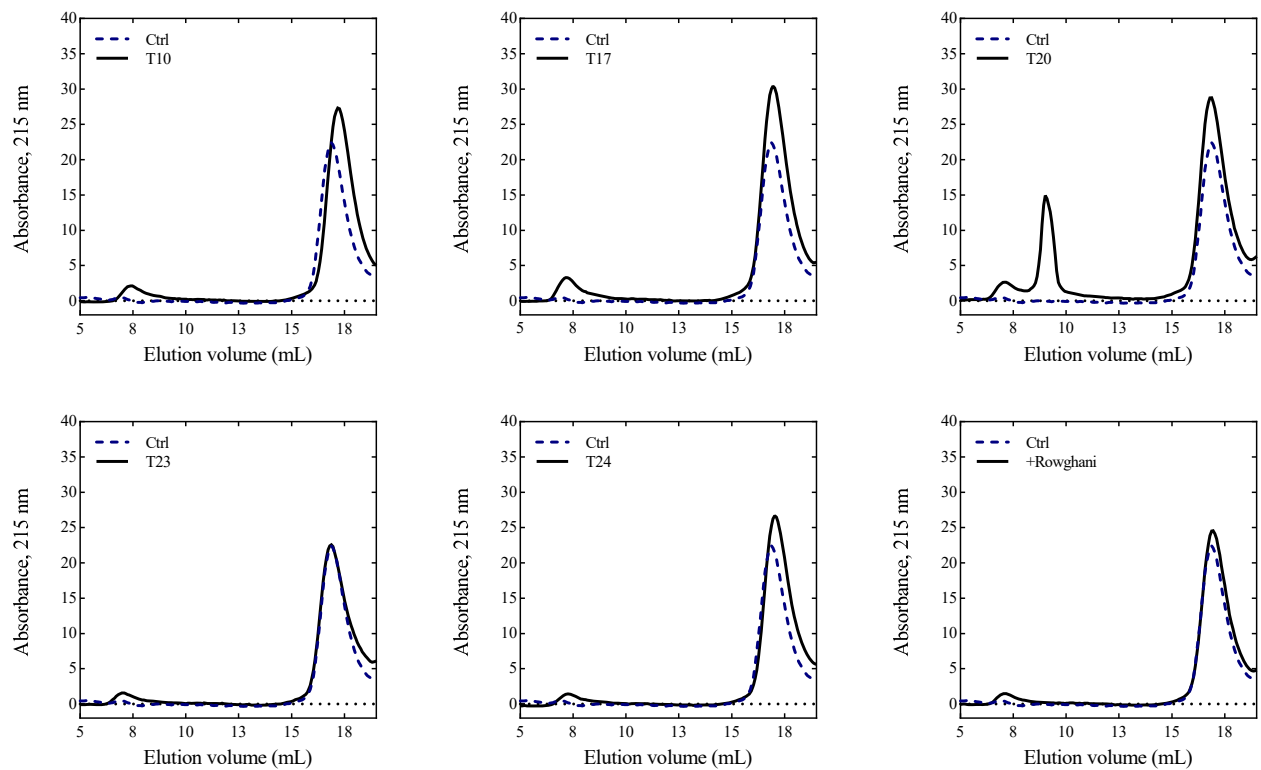

**Fig. S4.** Disaggregation assay. SEC profile of the supernatants of preformed  $\alpha$ SN fibrils incubated at 0.5 mg/ml overnight at 37°C in the absence (Ctrl) and presence of 0.15 mg/ml of the best extracts.

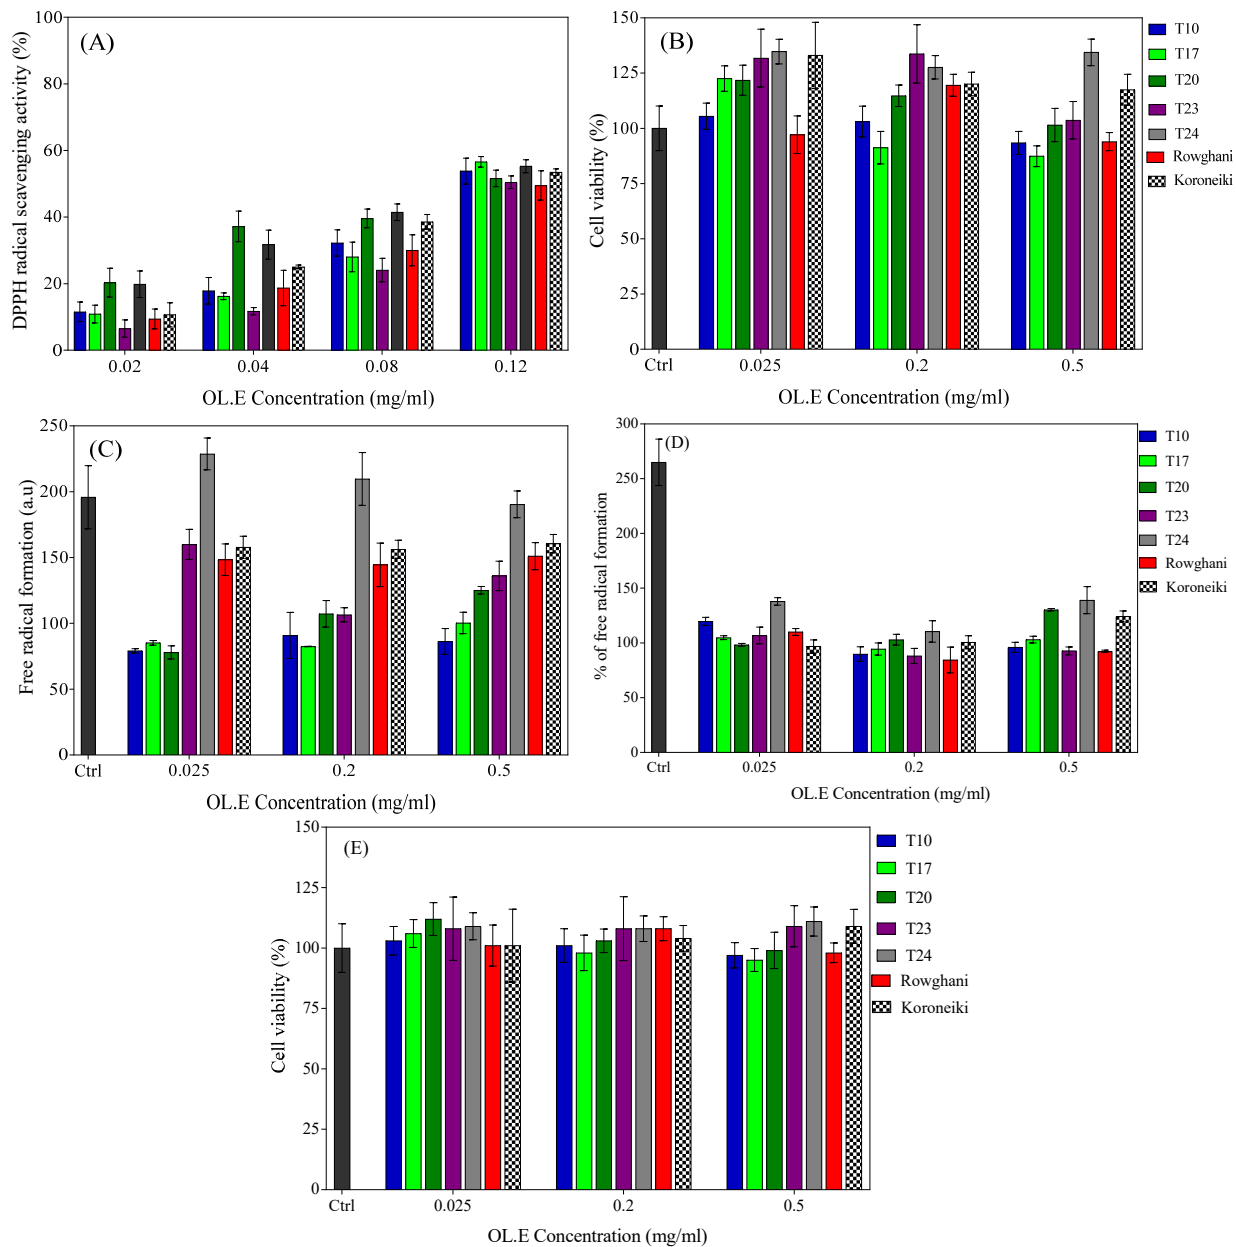

**Fig. S5.** Antioxidant activity and toxicity of the olive extracts. (A) Antioxidant activity of different olive fruit extracts at different concentrations (0.02, 0.04, 0.08, 0.12 mg/ml) measured by DPPH assay. (B) Viability of OLN-93 cells after 24 h incubation with the best olive extracts at different concentrations (0.025, 0.2, 0.5 mg/ml). (C) Oxidative stress in OLN-93 cells treated with olive extracts at different concentrations determined by DCFH-DA assay. (D) Free radical scavenging ability of the olive extracts measured in OLN-93 cells treated with 100  $\mu$ M H<sub>2</sub>O<sub>2</sub>. (E) Viability of SH-SY5Y cells after 24 h incubation with 0-0.5 mg/ml of the best olive extracts.

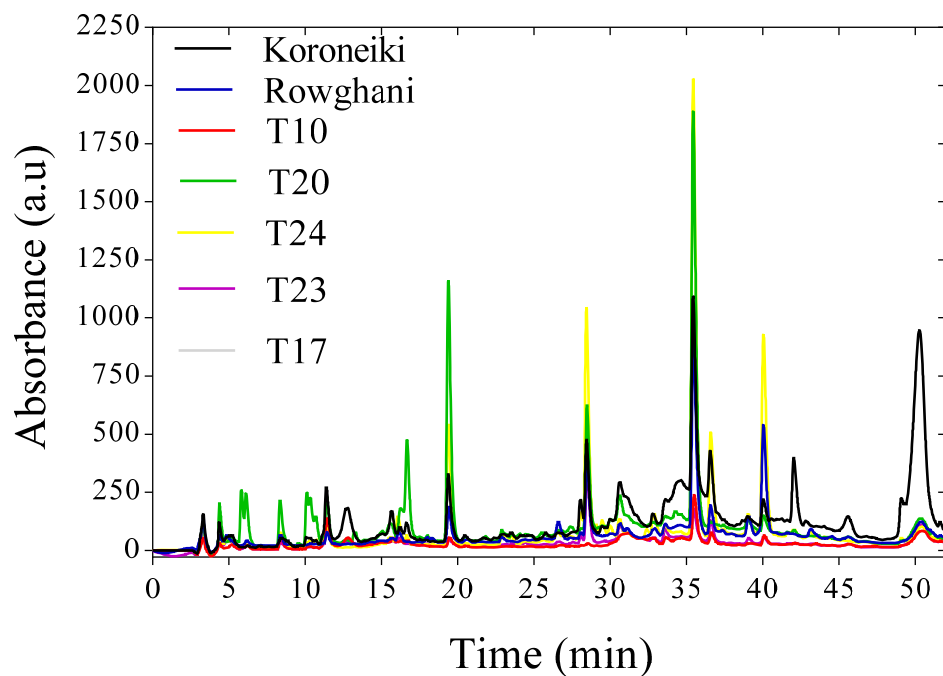

**Fig. S6.** HPLC chromatograms of the 7 most efficient anti-aggregative olive extracts, recorded at 230 nm.

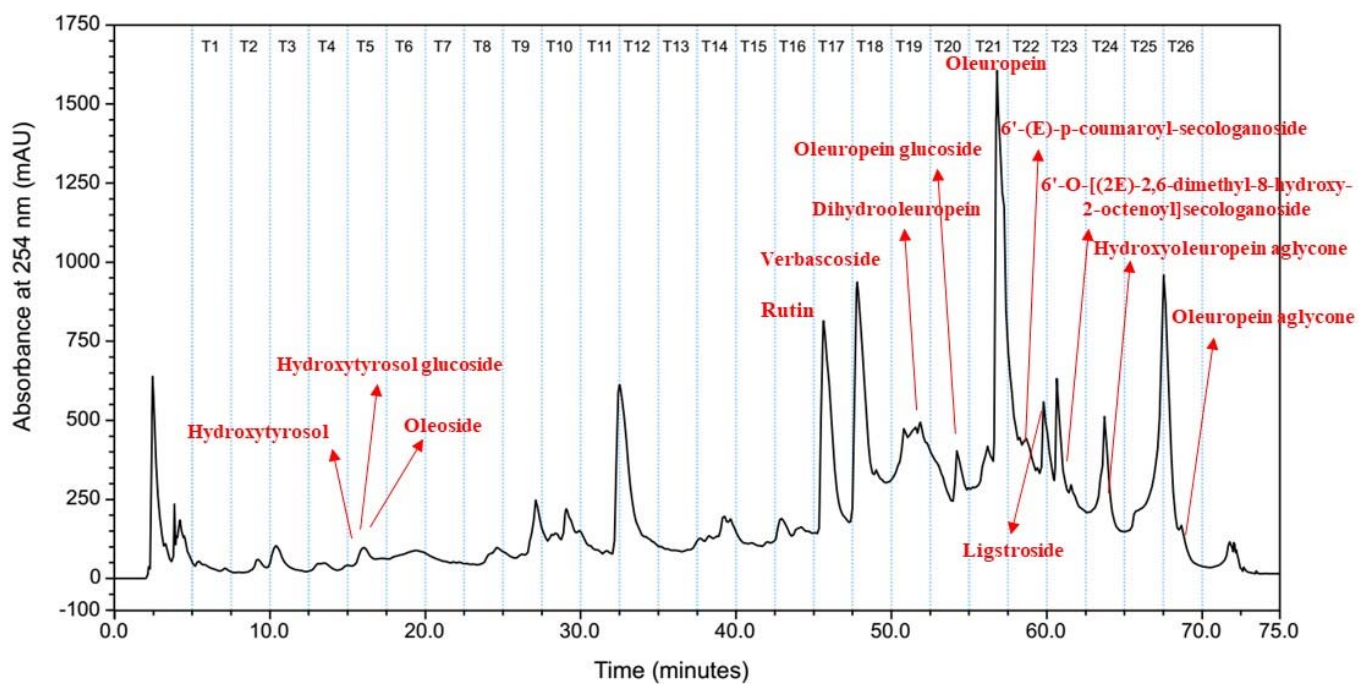

**Fig. S7.** Chromatogram of Koroneiki extract using HPLC. Fractions T1-26 are indicated. The different were identified by HPLC-MS.

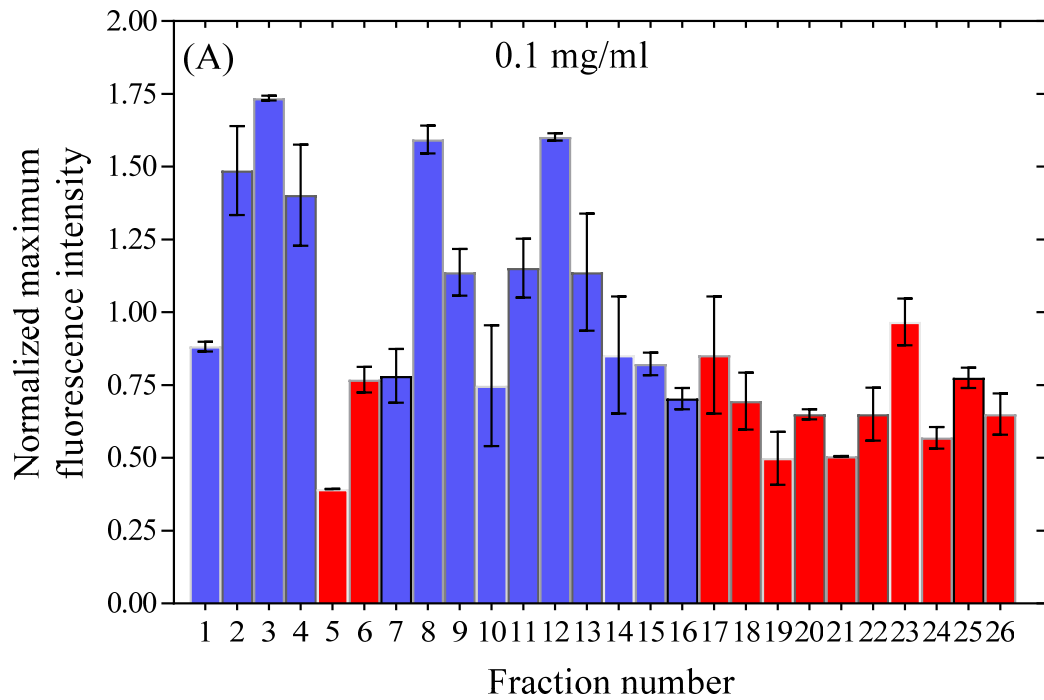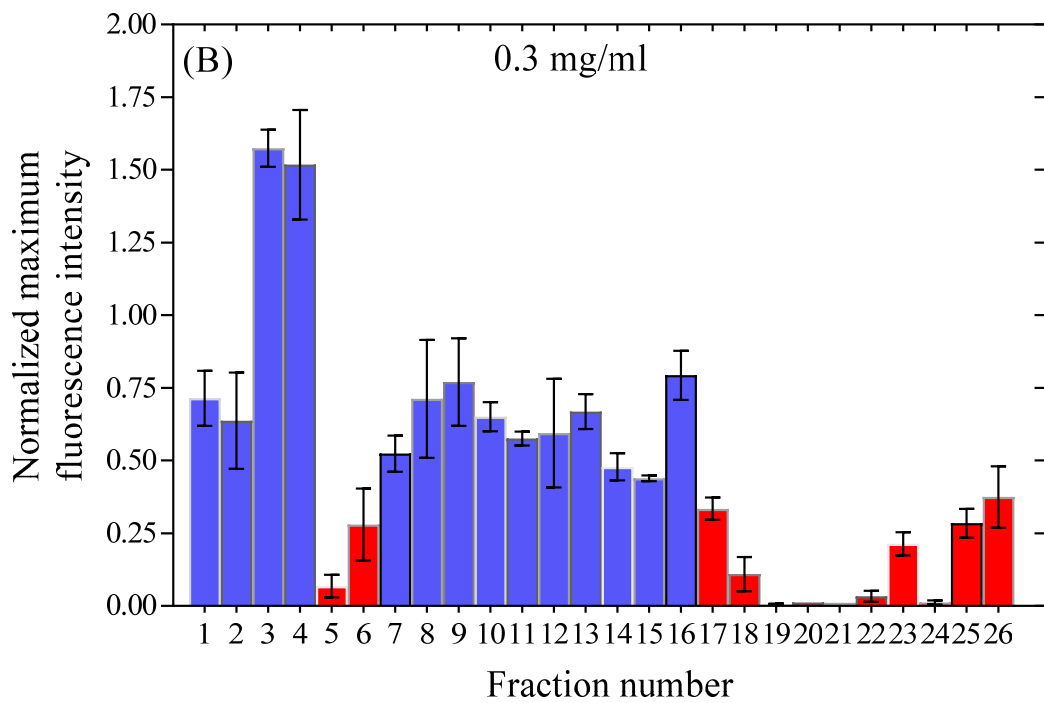

**Fig. S8.** The effect of (A) 1 mg/ml and (B) 3 mg/ml of the Koroneiki extract fractions on fibrillation of 1 mg/ml  $\alpha$ SN. Maximum ThT fluorescence intensity normalized to control (absence of extract).

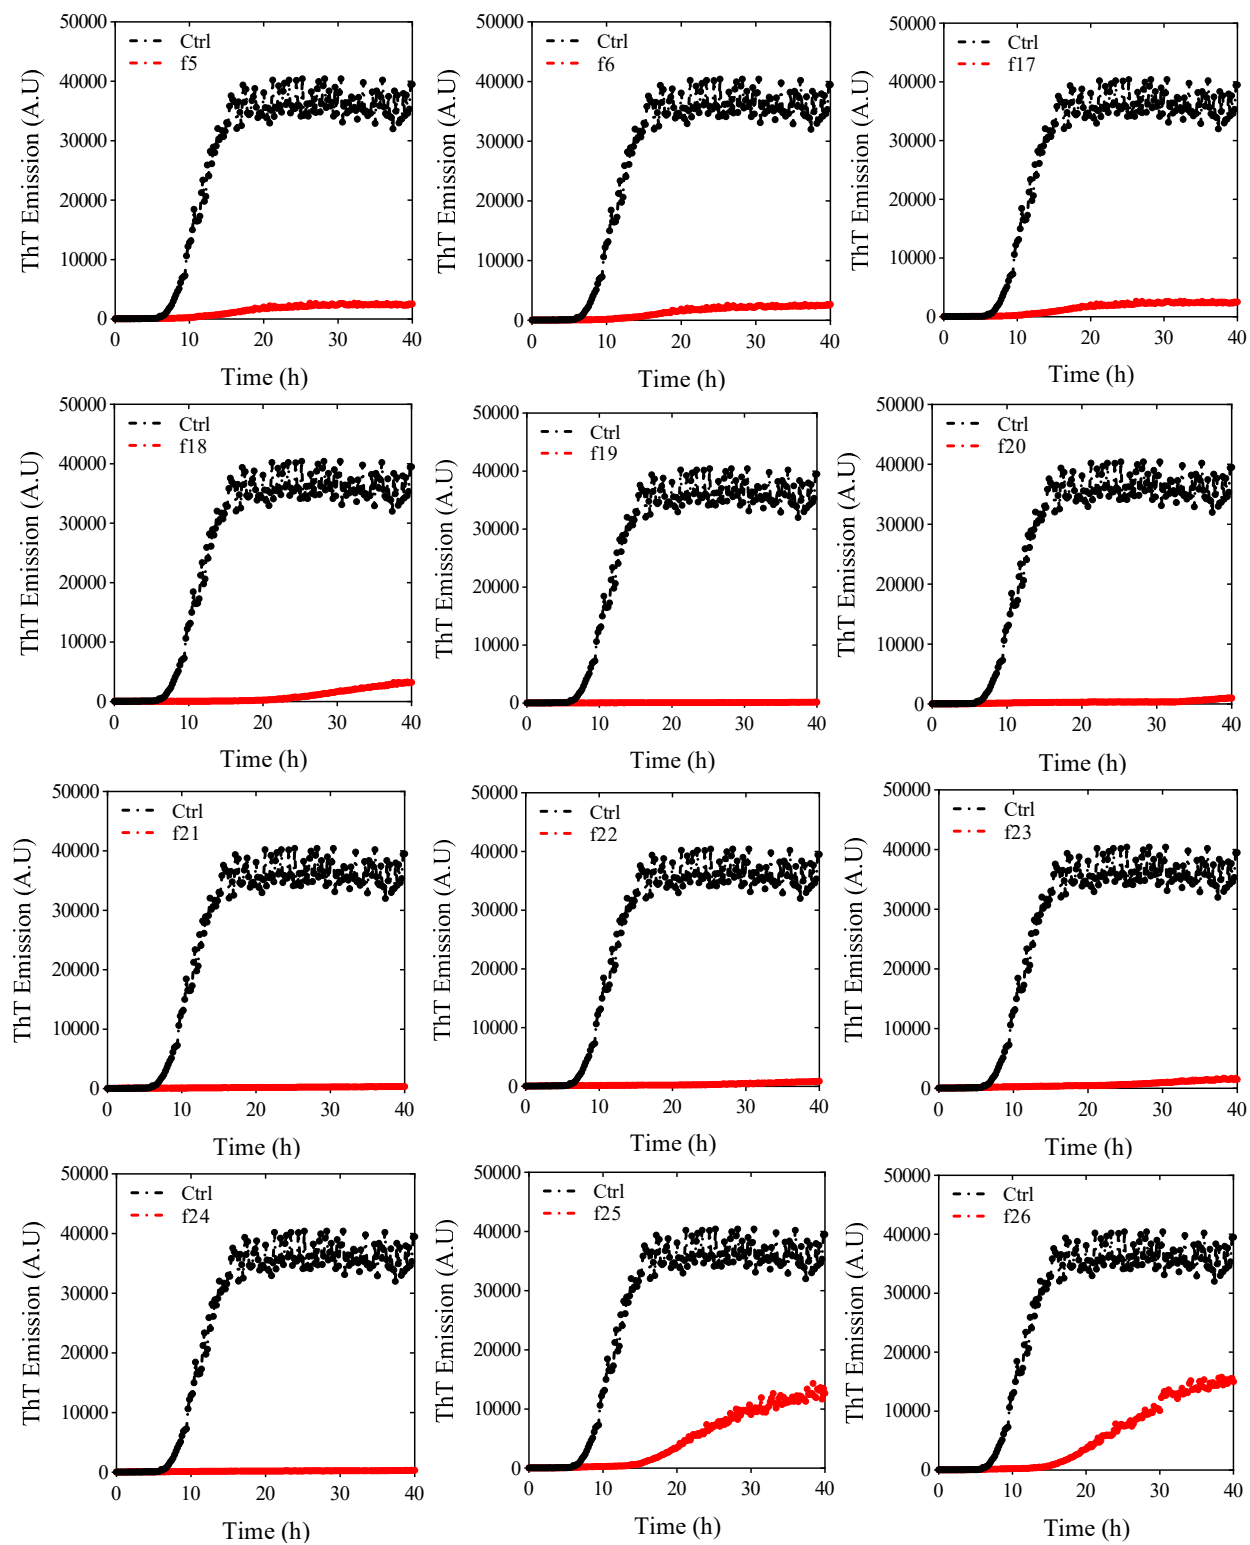

**Fig. S9.** The effect of Koroneiki extract fractions (3 mg/ml) on the kinetics of fibrillation of 1 mg/ml  $\alpha$ SN monitored by ThT fluorescence.

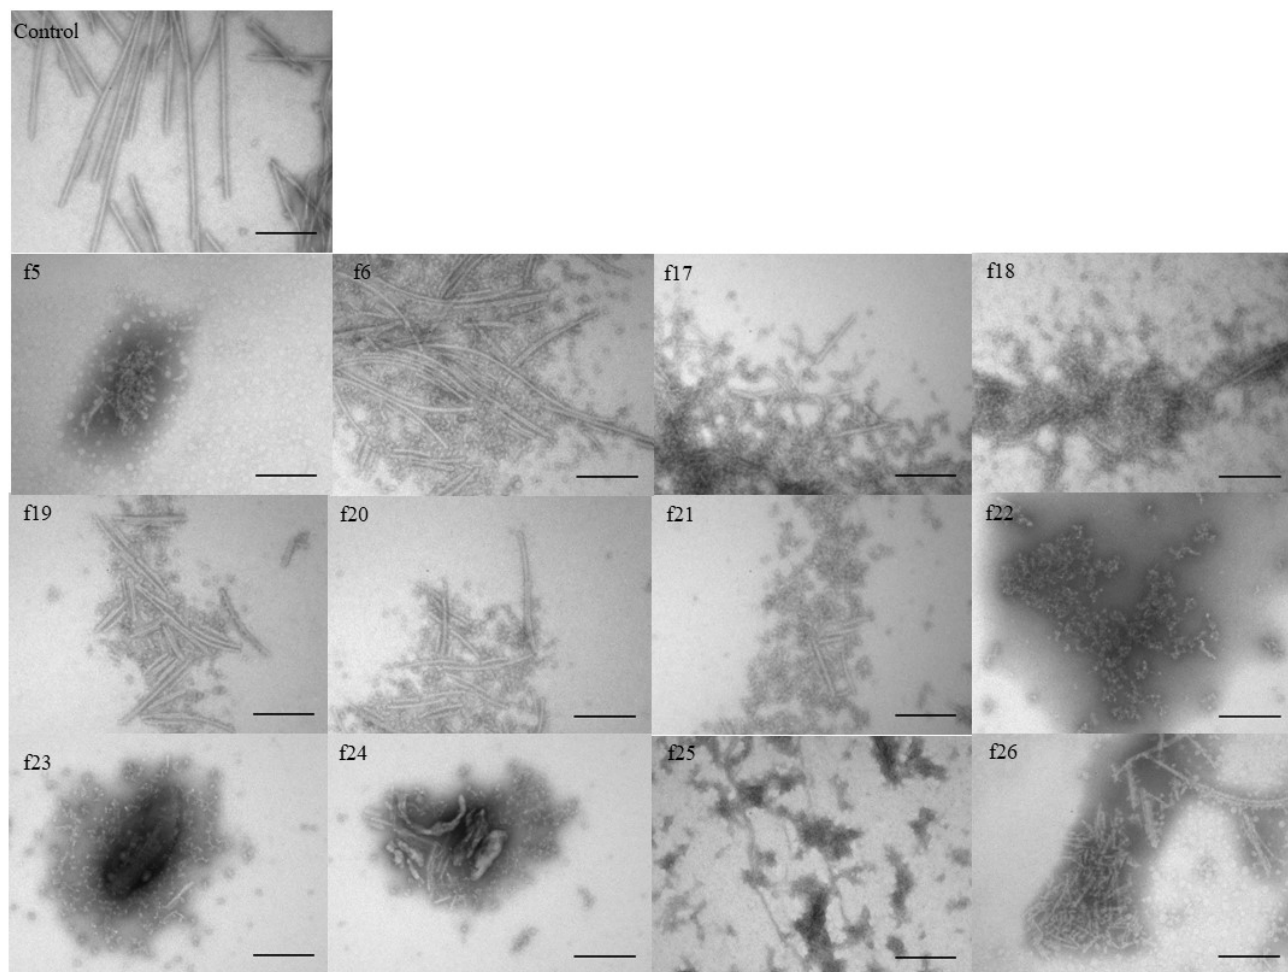

**Fig. S10.** TEM images of 1 mg/ml  $\alpha$ SN incubated alone (control) and in the presence of 3 mg/ml of Koroneiki extract fractions.



(A)

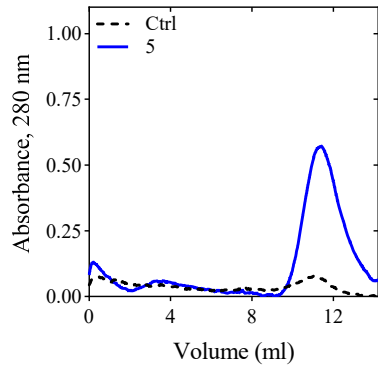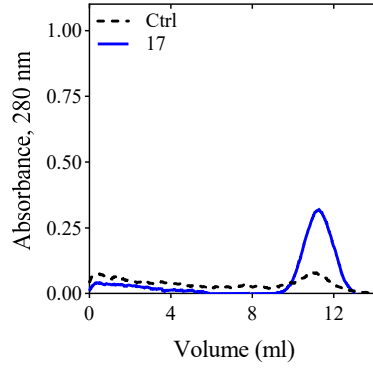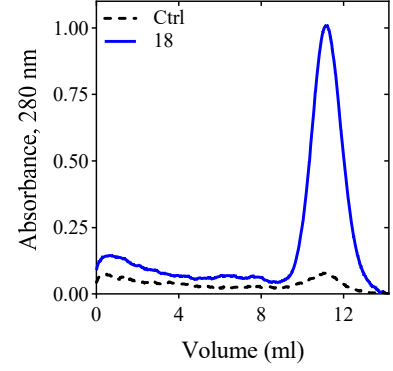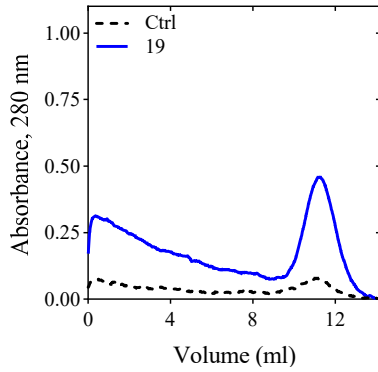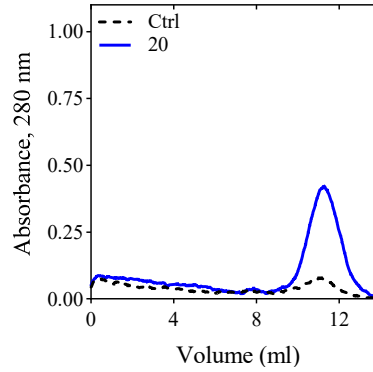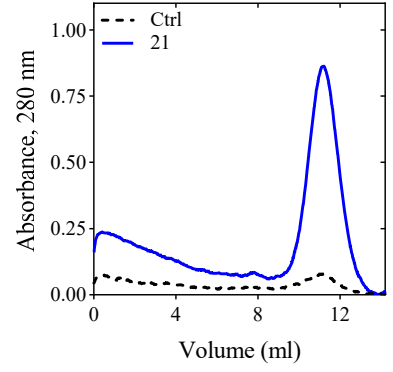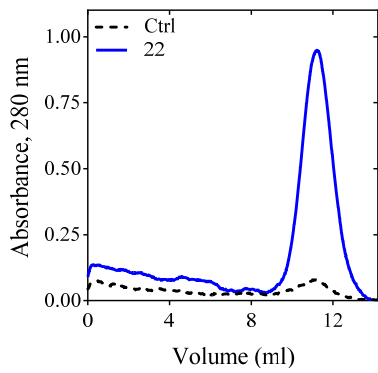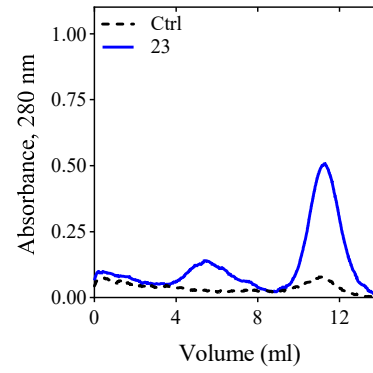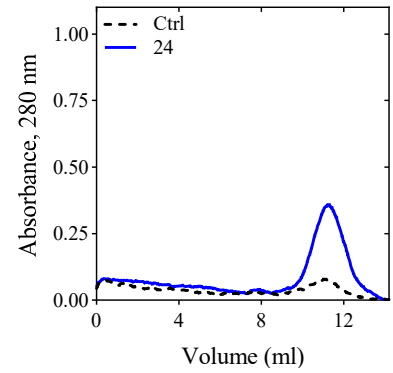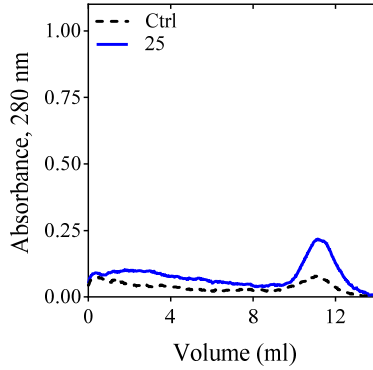

(B)

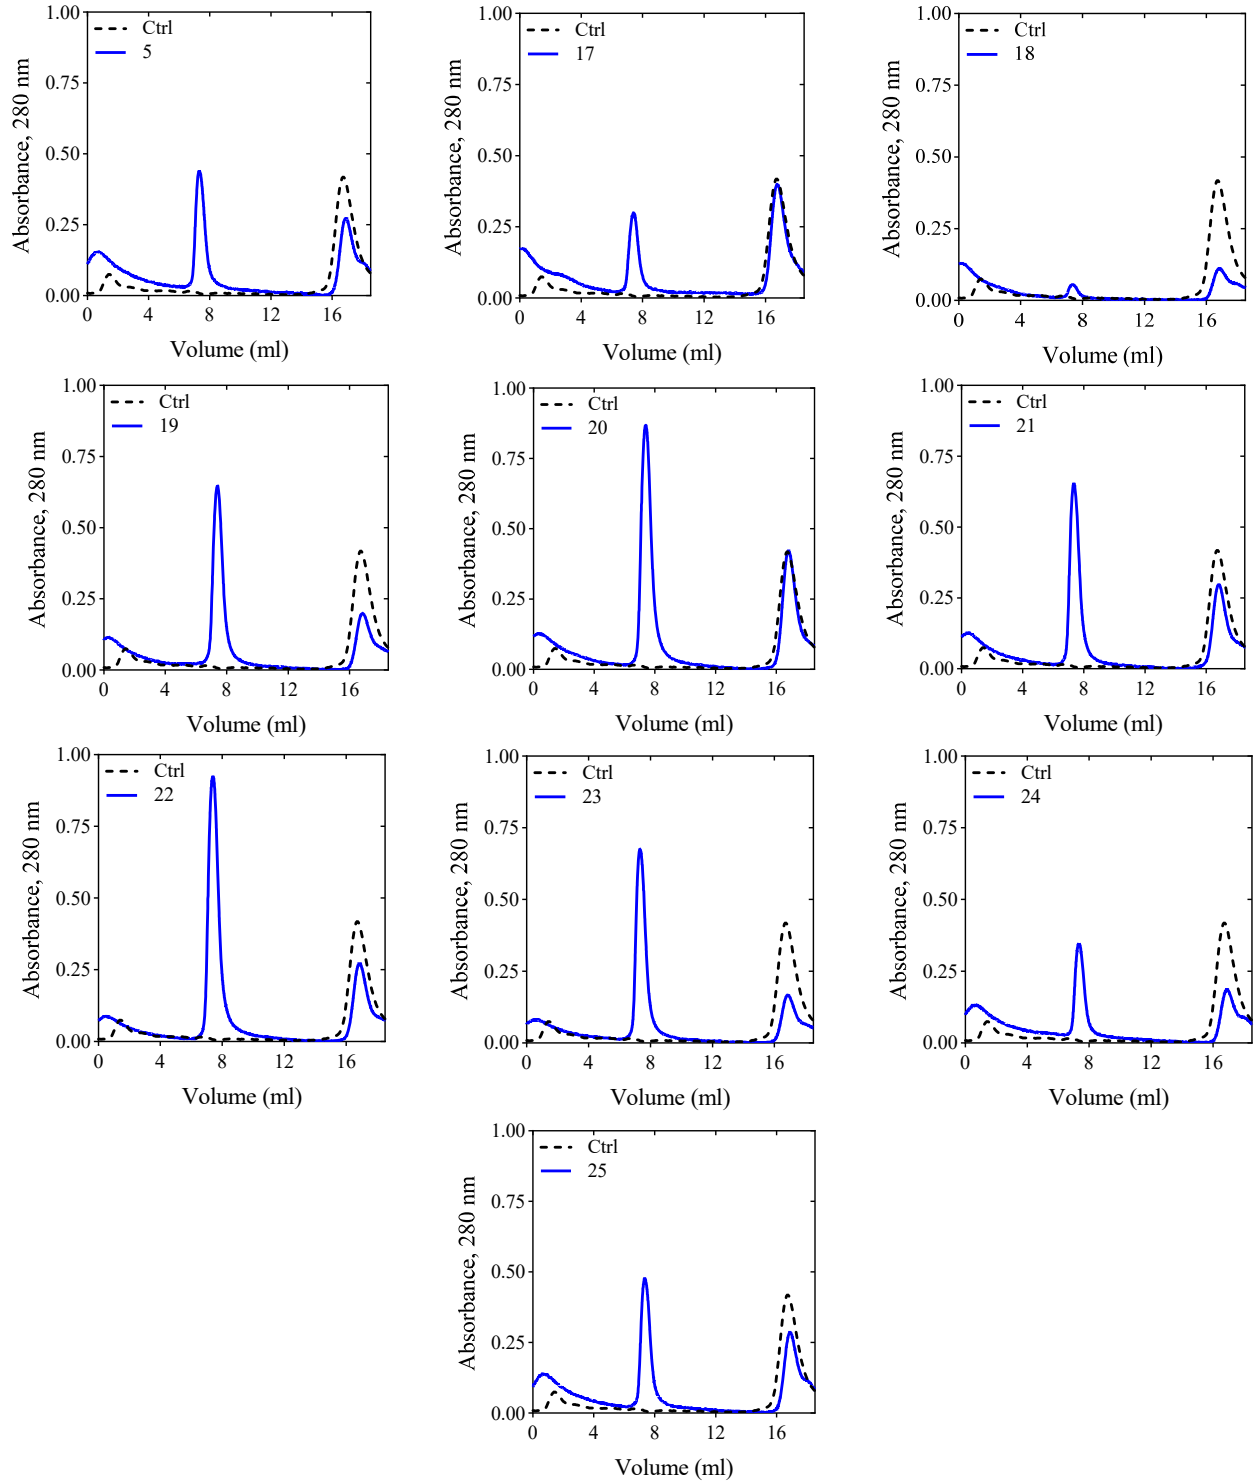

**Fig. S11.** SEC profiles of the supernatants of (A) samples of 1 mg/ml  $\alpha$ SN incubated for 1 h at 37°C in an oligomerization assay and (B) 0.5 mg/ml preformed  $\alpha$ SN fibrils preincubated overnight at 37°C with and without 3 mg/ml of Koroneiki extract fractions in a disaggregation assay.

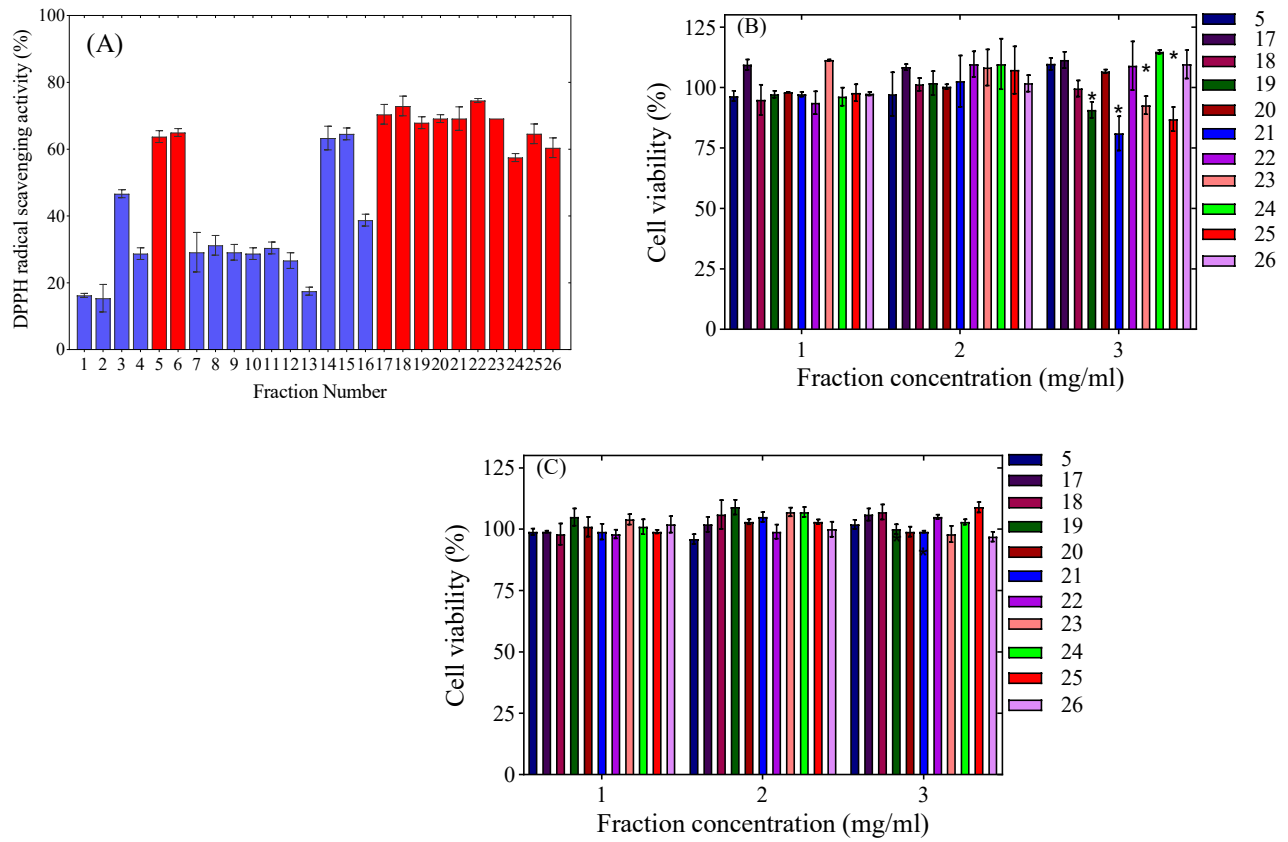

**Fig. S12.** (A) Antioxidant activity of Koroneiki extract fractions (3 mg/ml) measured by DPPH assay. Viability of (B) OLN-93 and (C) SH-SY5Y cells after 24 h incubation with 1-3 mg/ml Koroneiki extract fractions.

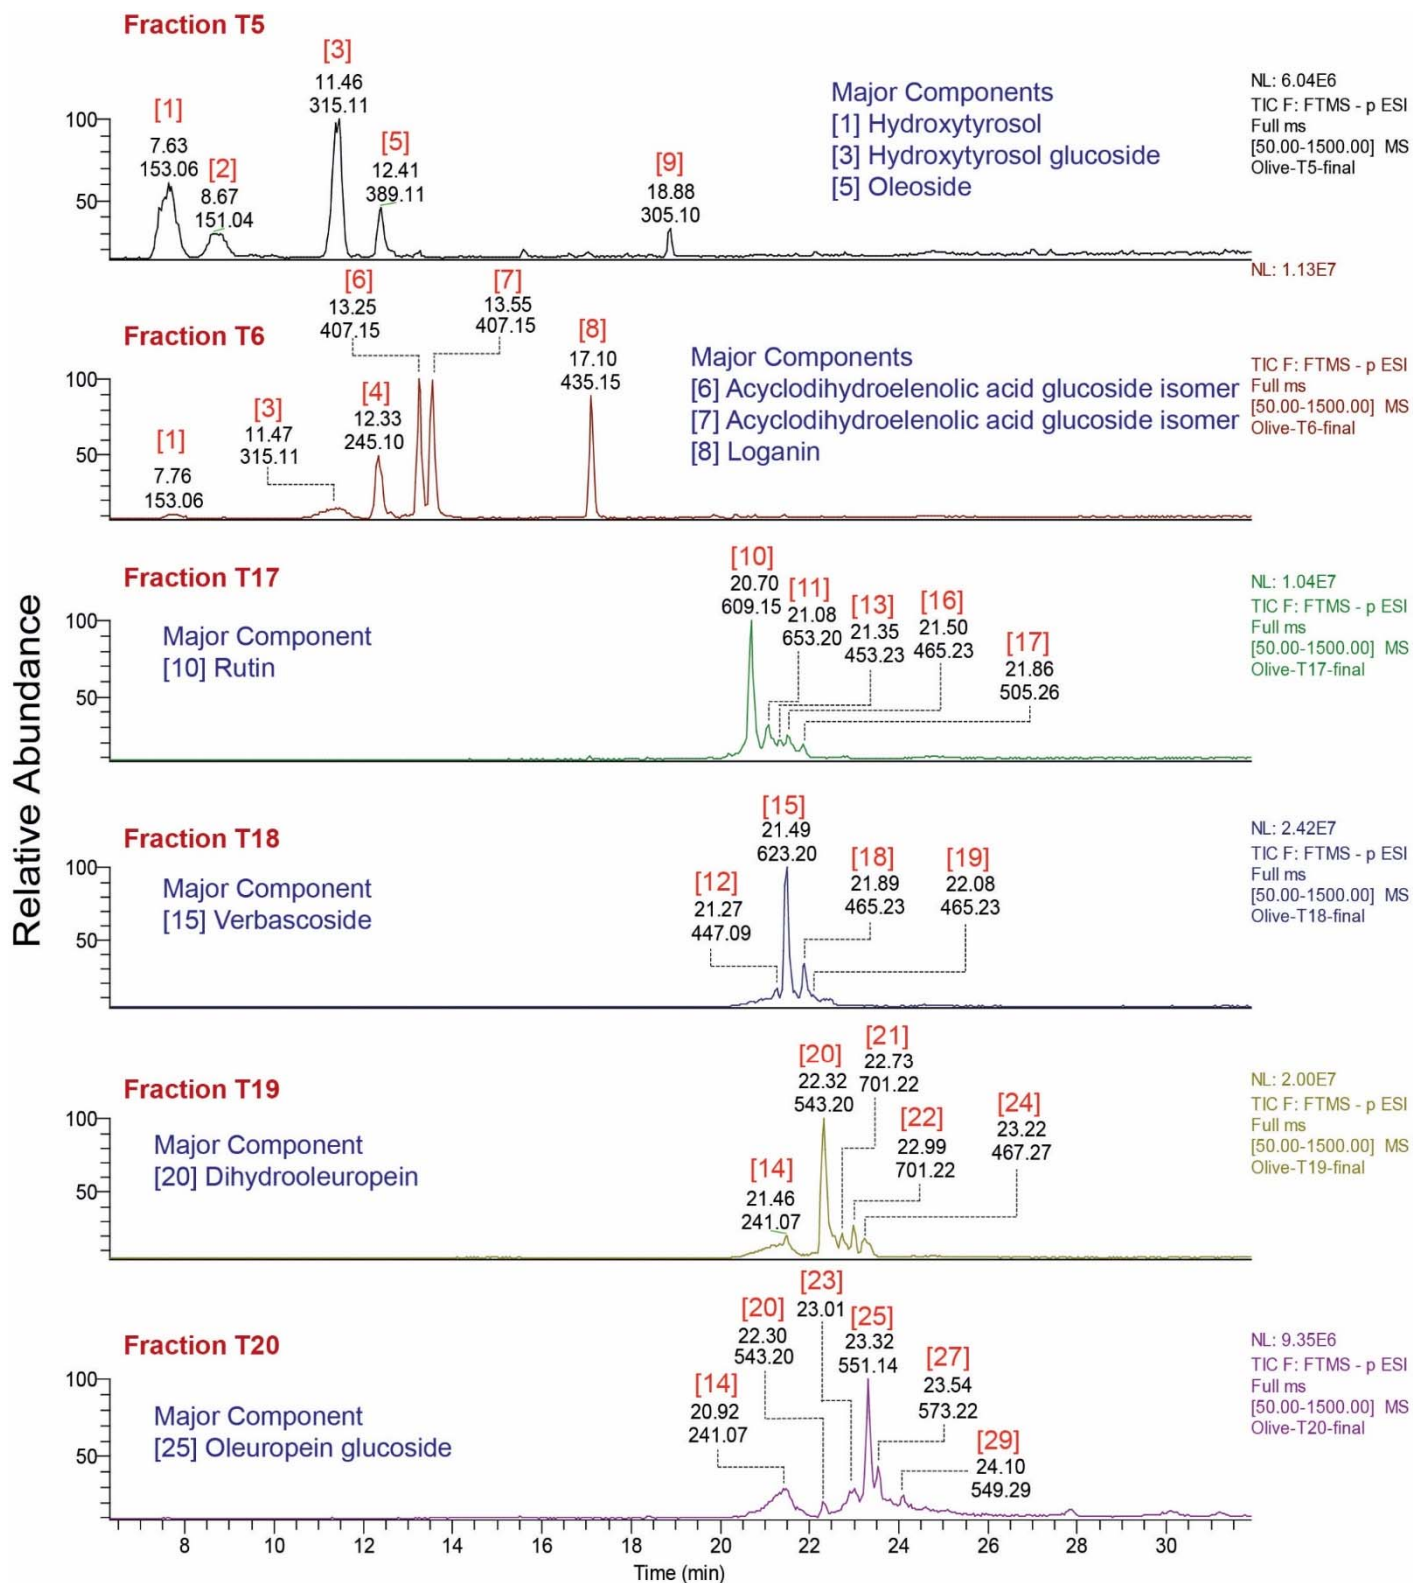

Fig. S13. Total ion chromatograms of Koroneiki fractions

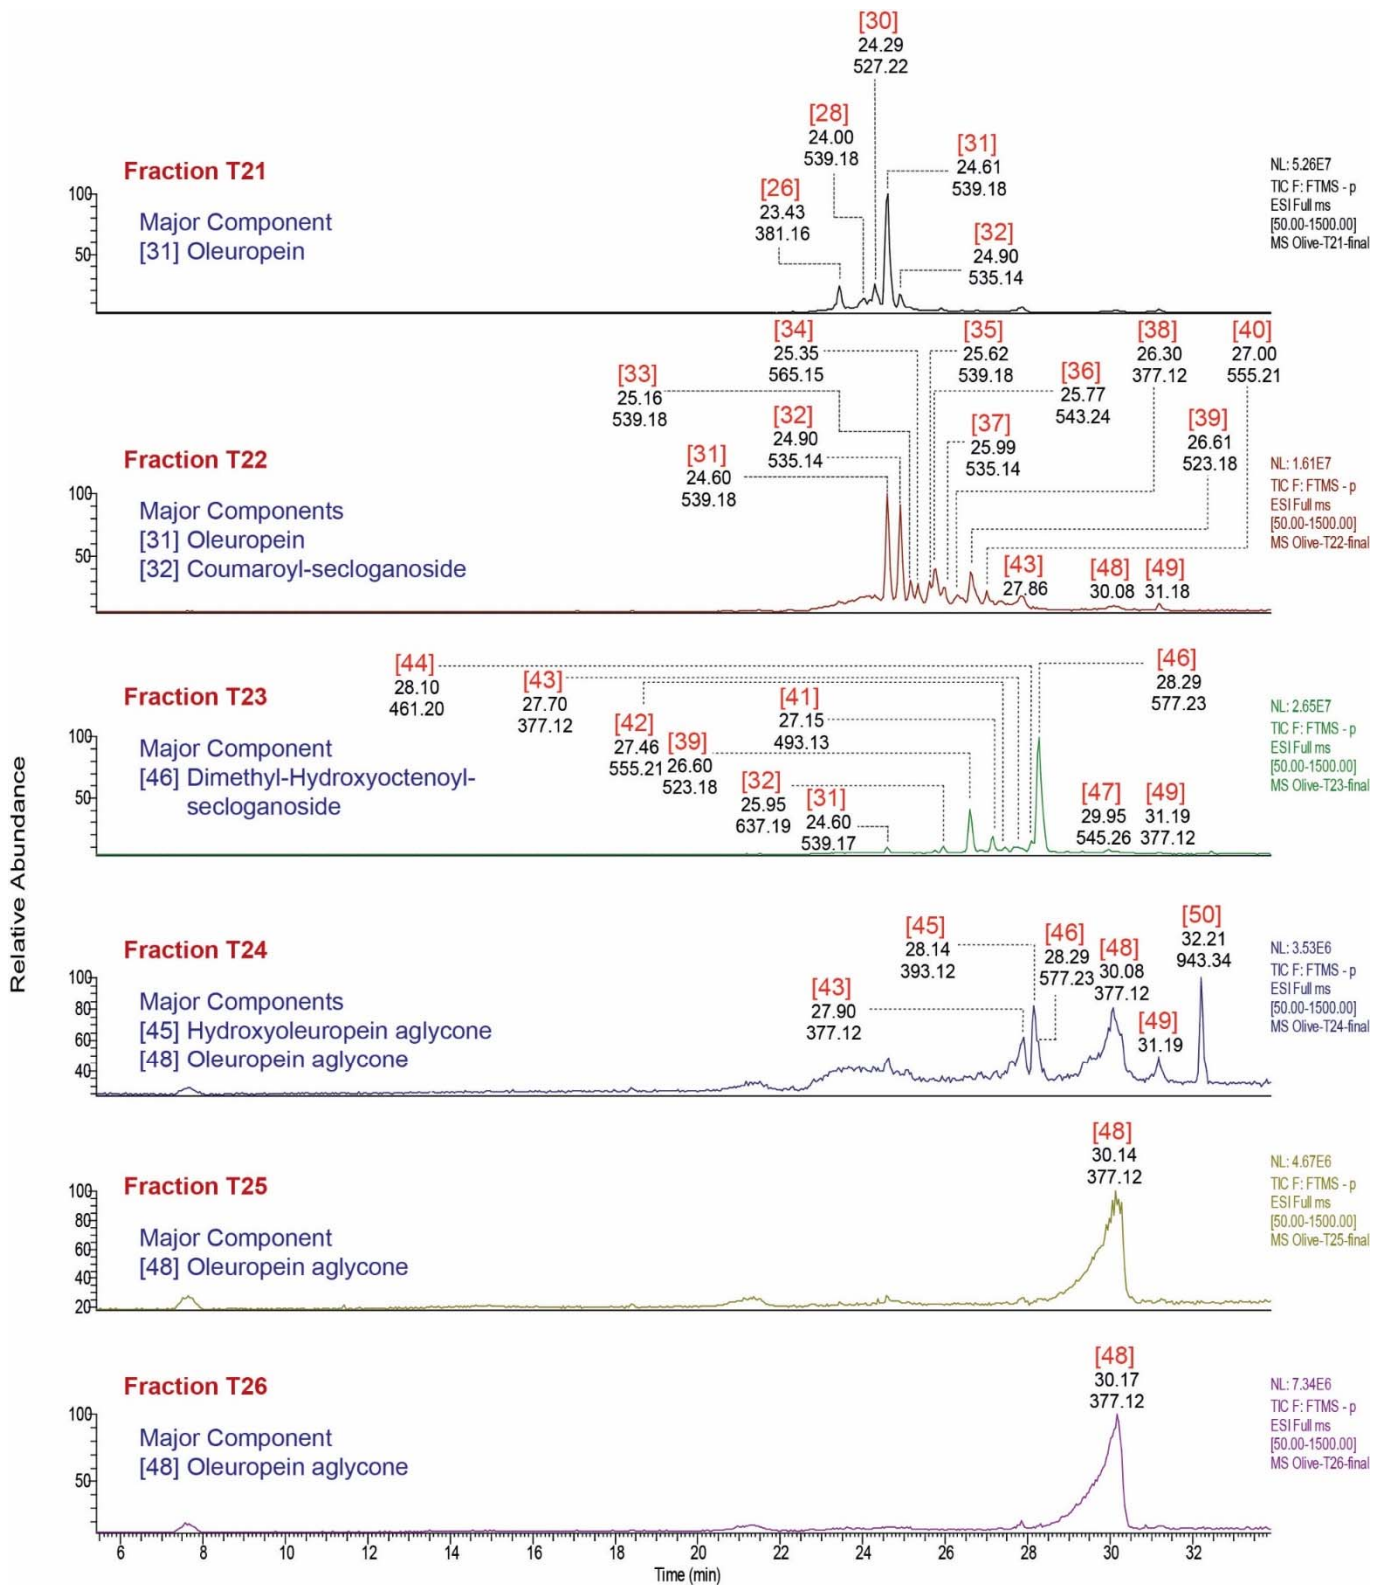

Fig. S13 (cont'd). Total ion chromatograms of Koroneiki fractions.

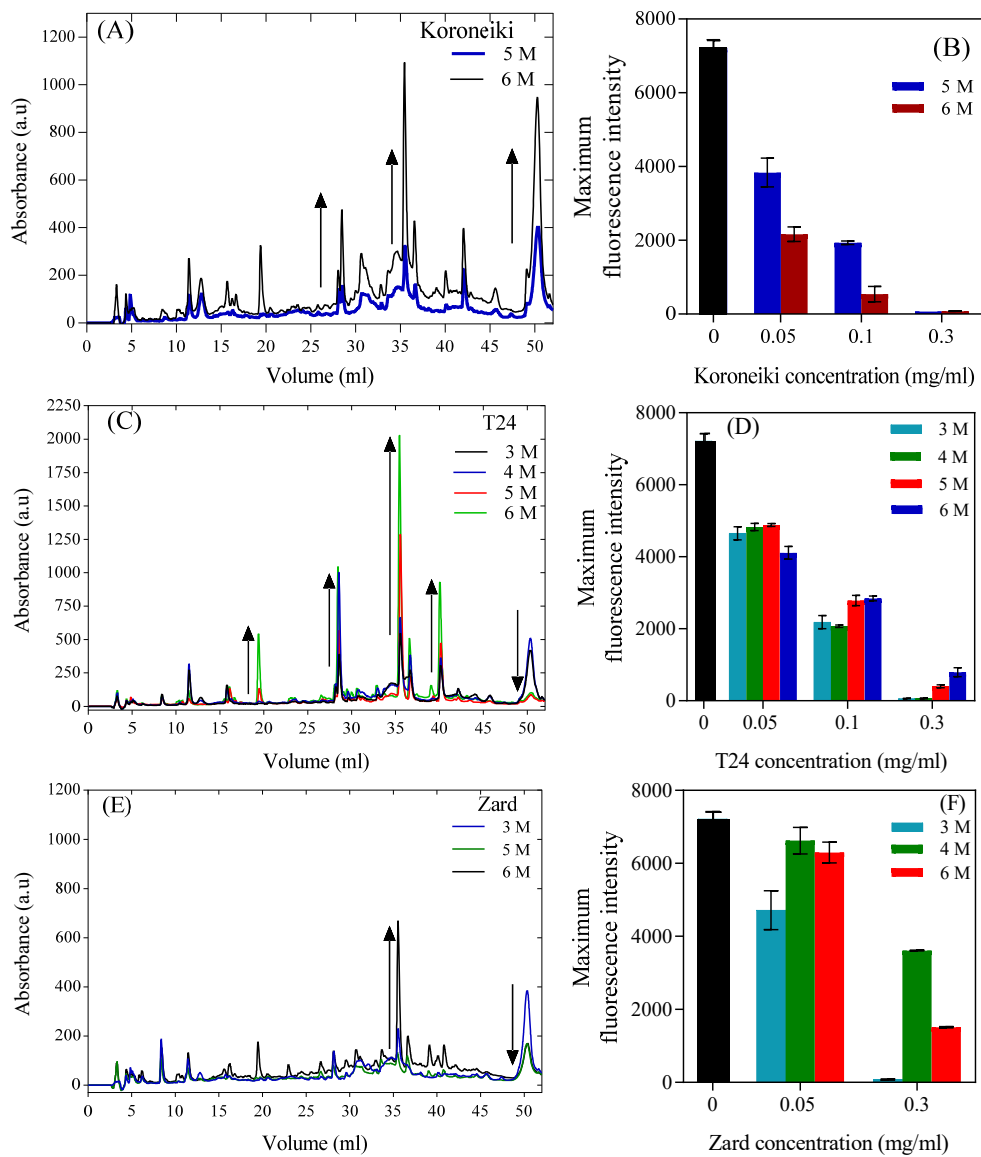

**Fig. S14.** Change in the level of compounds in the extracts of fruits picked at different maturation time (3, 4, 5, and 6 months after flowering) and their inhibitory effect on  $\alpha$ SN fibrillation. HPLC chromatogram of the extracts (A, C, and E) and their effect on the maximum ThT fluorescence intensity (B, D, and F)

**Table S1.** Olive cultivars used in this study.

| Nr | Olive Cultivar | Abbreviation | Origin | Nr | Olive Cultivar | Abbreviation | Origin |
|----|----------------|--------------|--------|----|----------------|--------------|--------|
| 1  | Koroneiki      | -            | Greece | 9  | Chenaran       | T16          | Iran   |
| 2  | Arbequina      | -            | Spain  | 10 | Khoshe         | T17          | Iran   |
| 3  | Picual         | -            | Spain  | 11 | Parseh         | T18          | Iran   |
| 4  | Mari           | -            | Iran   | 12 | Majnon         | T20          | Iran   |
| 5  | Rowghani       | -            | Iran   | 13 | Tak            | T22          | Iran   |
| 6  | Zard           | -            | Iran   | 14 | Zarin          | T23          | Iran   |
| 7  | Yaghout        | T10          | Iran   | 15 | Arghavan       | T24          | Iran   |
| 8  | Gorgan         | T15          | Iran   |    |                |              |        |

**Table S2. LC-MS data of fractions f5, 6, and 17-26 of Koroneiki extract obtained from HPLC separation**

| Peak | Retention time (min) | m/z      | Predicted ion formula                                           | Delta (ppm) | MS-MS                                                                                                                                                                                                                                                                                                                                                                                                                                                                                                   | $\lambda_{max}$ | Identity or Compound class                                                  | How identified                                | Previously observed in <i>Olea</i> species? (reference) |
|------|----------------------|----------|-----------------------------------------------------------------|-------------|---------------------------------------------------------------------------------------------------------------------------------------------------------------------------------------------------------------------------------------------------------------------------------------------------------------------------------------------------------------------------------------------------------------------------------------------------------------------------------------------------------|-----------------|-----------------------------------------------------------------------------|-----------------------------------------------|---------------------------------------------------------|
| 1    | 7.63                 | 153.0556 | [C <sub>8</sub> H <sub>9</sub> O <sub>3</sub> ] <sup>-</sup>    | 0.94        | 123 (C <sub>7</sub> H <sub>7</sub> O <sub>2</sub> )                                                                                                                                                                                                                                                                                                                                                                                                                                                     | 281             | Hydroxytyrosol                                                              | authentic standard                            | Yes (1)                                                 |
| 2    | 8.67                 | 151.0401 | [C <sub>8</sub> H <sub>7</sub> O <sub>3</sub> ] <sup>-</sup>    | 1.49        | -                                                                                                                                                                                                                                                                                                                                                                                                                                                                                                       | 280             | 4-Hydroxyphenylacetate                                                      | Accurate mass.                                | Yes (1)                                                 |
| 3    | 11.46                | 315.1086 | [C <sub>14</sub> H <sub>19</sub> O <sub>8</sub> ] <sup>-</sup>  | 1.29        | 153 (C <sub>8</sub> H <sub>9</sub> O <sub>3</sub> )                                                                                                                                                                                                                                                                                                                                                                                                                                                     | 278             | Hydroxytyrosol glucoside                                                    | MSMS and literature data <sup>a</sup>         | Yes (1)                                                 |
| 4    | 12.33                | 245.1034 | [C <sub>11</sub> H <sub>17</sub> O <sub>6</sub> ] <sup>-</sup>  | 1.39        | -                                                                                                                                                                                                                                                                                                                                                                                                                                                                                                       | -               | Unknown                                                                     | -                                             | -                                                       |
| 5    | 12.41                | 389.1090 | [C <sub>16</sub> H <sub>21</sub> O <sub>11</sub> ] <sup>-</sup> | 1.11        | 227 (C <sub>10</sub> H <sub>11</sub> O <sub>6</sub> ), 183 (C <sub>9</sub> H <sub>11</sub> O <sub>4</sub> ), 165 (C <sub>9</sub> H <sub>9</sub> O <sub>3</sub> ), 121 (C <sub>8</sub> H <sub>9</sub> O), 89 (C <sub>3</sub> H <sub>5</sub> O <sub>3</sub> )                                                                                                                                                                                                                                             |                 | Oleoside                                                                    | RT, MS, MSMS and literature data <sup>b</sup> | Yes (2)                                                 |
| 6    | 13.25                | 407.1560 | [C <sub>17</sub> H <sub>27</sub> O <sub>11</sub> ] <sup>-</sup> | 1.21        | 389 (C <sub>17</sub> H <sub>25</sub> O <sub>10</sub> ), 377 (C <sub>16</sub> H <sub>25</sub> O <sub>10</sub> ), 357 (C <sub>16</sub> H <sub>21</sub> O <sub>9</sub> ), 313 (C <sub>15</sub> H <sub>21</sub> O <sub>7</sub> ), 183 (C <sub>10</sub> H <sub>15</sub> O <sub>3</sub> ), 151 (C <sub>9</sub> H <sub>11</sub> O <sub>2</sub> ), 113 (C <sub>5</sub> H <sub>5</sub> O <sub>3</sub> ), 101 (C <sub>4</sub> H <sub>5</sub> O <sub>3</sub> ), 89 (C <sub>3</sub> H <sub>5</sub> O <sub>3</sub> ) |                 | Glucosyl acyclodihydroelenolic acid isomer I                                | Putative from MSMS.                           | Yes (3)                                                 |
| 7    | 13.55                | 407.1560 | [C <sub>17</sub> H <sub>27</sub> O <sub>11</sub> ] <sup>-</sup> | 1.24        | 389 (C <sub>17</sub> H <sub>25</sub> O <sub>10</sub> ), 377 (C <sub>16</sub> H <sub>25</sub> O <sub>10</sub> ), 357 (C <sub>16</sub> H <sub>21</sub> O <sub>9</sub> ), 313 (C <sub>15</sub> H <sub>21</sub> O <sub>7</sub> ), 183 (C <sub>10</sub> H <sub>15</sub> O <sub>3</sub> ), 151 (C <sub>9</sub> H <sub>11</sub> O <sub>2</sub> ), 113 (C <sub>5</sub> H <sub>5</sub> O <sub>3</sub> ), 101 (C <sub>4</sub> H <sub>5</sub> O <sub>3</sub> ), 89 (C <sub>3</sub> H <sub>5</sub> O <sub>3</sub> ) |                 | Glucosyl acyclodihydroelenolic acid.isomer II                               | Putative from MSMS. Identical to Peak 6       | Yes (3)                                                 |
| 8    | 17.10                | 435.1506 | [C <sub>18</sub> H <sub>27</sub> O <sub>12</sub> ] <sup>-</sup> | 0.877       | 357 (C <sub>16</sub> H <sub>21</sub> O <sub>9</sub> ), 313 (C <sub>15</sub> H <sub>21</sub> O <sub>7</sub> ), 183 (C <sub>10</sub> H <sub>15</sub> O <sub>3</sub> ), 169 (C <sub>9</sub> H <sub>13</sub> O <sub>3</sub> ), 151 (C <sub>9</sub> H <sub>11</sub> O <sub>2</sub> ), 113 (C <sub>5</sub> H <sub>5</sub> O <sub>3</sub> ), 101                                                                                                                                                               | 219             | Formate adduct of Loganin(C <sub>17</sub> H <sub>25</sub> O <sub>10</sub> ) | RT, MS, MSMS and literature data <sup>b</sup> | Yes (2)                                                 |



|    |       |          |                                                                 |       |                                                                                                                                                                                                                                                                                                                                                 |          |                                                                                                                                                                          |                                                        |         |
|----|-------|----------|-----------------------------------------------------------------|-------|-------------------------------------------------------------------------------------------------------------------------------------------------------------------------------------------------------------------------------------------------------------------------------------------------------------------------------------------------|----------|--------------------------------------------------------------------------------------------------------------------------------------------------------------------------|--------------------------------------------------------|---------|
|    |       |          |                                                                 |       | (C <sub>4</sub> H <sub>5</sub> O <sub>3</sub> ), 89<br>(C <sub>3</sub> H <sub>5</sub> O <sub>3</sub> )                                                                                                                                                                                                                                          |          |                                                                                                                                                                          |                                                        |         |
| 9  | 18.88 | 305.1038 | [C <sub>16</sub> H <sub>17</sub> O <sub>6</sub> ] <sup>-</sup>  | 1.82  | 153 (C <sub>8</sub> H <sub>9</sub> O <sub>3</sub> ), 151<br>(C <sub>8</sub> H <sub>7</sub> O <sub>3</sub> ), 123<br>(C <sub>7</sub> H <sub>7</sub> O <sub>2</sub> )                                                                                                                                                                             | 217      | Conjugate of hydroxytyrosol<br>and hydroxyphenyl acetate<br>(ie 4-(hydroxyphenyl)ethyl<br>2-(4-hydroxyphenyl)acetate)<br>OR conjugate of Vanillin<br>and hydroxy tyrosol | Putative<br>based on<br>MS/MSMS<br>fragmentati<br>on   | -       |
| 10 | 20.70 | 609.1514 | [C <sub>27</sub> H <sub>29</sub> O <sub>16</sub> ] <sup>-</sup> | 1.17  | 300 (C <sub>15</sub> H <sub>8</sub> O <sub>7</sub> )                                                                                                                                                                                                                                                                                            | 253, 354 | Rutin                                                                                                                                                                    | Authentic<br>standard                                  | Yes (2) |
| 11 | 21.08 | 653.2030 | [C <sub>30</sub> H <sub>37</sub> O <sub>16</sub> ] <sup>-</sup> | 1.30  | 621 (C <sub>29</sub> H <sub>33</sub> O <sub>15</sub> ), 459<br>(C <sub>20</sub> H <sub>27</sub> O <sub>12</sub> ), 179<br>(C <sub>9</sub> H <sub>7</sub> O <sub>4</sub> ), 161<br>(C <sub>9</sub> H <sub>5</sub> O <sub>3</sub> ), 151<br>(C <sub>8</sub> H <sub>7</sub> O <sub>3</sub> )                                                       |          | Methoxyverbascoside                                                                                                                                                      | RT, MS,<br>MSMS and<br>literature<br>data <sup>b</sup> | Yes (2) |
| 12 | 21.27 | 447.0934 | [C <sub>21</sub> H <sub>19</sub> O <sub>11</sub> ] <sup>-</sup> | 1.18  | 285 (C <sub>15</sub> H <sub>9</sub> O <sub>6</sub> )                                                                                                                                                                                                                                                                                            | 346      | Luteolin-7-glucoside                                                                                                                                                     | Authentic<br>standard                                  | Yes (2) |
| 13 | 21.35 | 453.2337 | [C <sub>20</sub> H <sub>37</sub> O <sub>11</sub> ] <sup>-</sup> | 0.63  | 321 (C <sub>15</sub> H <sub>29</sub> O <sub>7</sub> ), 233<br>(C <sub>9</sub> H <sub>13</sub> O <sub>7</sub> ), 191<br>(C <sub>7</sub> H <sub>11</sub> O <sub>6</sub> ), 161<br>(C <sub>6</sub> H <sub>9</sub> O <sub>5</sub> ), 113<br>(C <sub>5</sub> H <sub>5</sub> O <sub>3</sub> ), 101<br>(C <sub>4</sub> H <sub>5</sub> O <sub>3</sub> ) | 218      | Unknown                                                                                                                                                                  | -                                                      | -       |
| 14 | 21.46 | 241.0719 | [C <sub>11</sub> H <sub>13</sub> O <sub>6</sub> ] <sup>-</sup>  | 0.169 | 139 (C <sub>6</sub> H <sub>3</sub> O <sub>4</sub> )                                                                                                                                                                                                                                                                                             | 219.,328 | Unknown                                                                                                                                                                  | -                                                      |         |
| 15 | 21.49 | 623.2022 | [C <sub>22</sub> H <sub>39</sub> O <sub>20</sub> ] <sup>-</sup> | -0.71 | 461 (C <sub>16</sub> H <sub>29</sub> O <sub>15</sub> ), 179<br>(C <sub>9</sub> H <sub>7</sub> O <sub>4</sub> ), 161<br>(C <sub>9</sub> H <sub>5</sub> O <sub>3</sub> )                                                                                                                                                                          | 330      | Verbascoside                                                                                                                                                             | RT, MS,<br>MSMS and<br>literature<br>data <sup>a</sup> | Yes (1) |
| 16 | 21.50 | 505.2626 | [C <sub>24</sub> H <sub>41</sub> O <sub>11</sub> ] <sup>-</sup> |       | 251 (C <sub>9</sub> H <sub>15</sub> O <sub>8</sub> ), 191<br>(C <sub>7</sub> H <sub>11</sub> O <sub>6</sub> ), 149<br>(C <sub>5</sub> H <sub>9</sub> O <sub>5</sub> ), 131<br>(C <sub>5</sub> H <sub>7</sub> O <sub>4</sub> ), 101<br>(C <sub>4</sub> H <sub>5</sub> O <sub>3</sub> ), 89<br>(C <sub>3</sub> H <sub>5</sub> O <sub>3</sub> )    |          | Unknown diglycoside                                                                                                                                                      | -                                                      | -       |
| 17 | 21.86 | 505.2625 | [C <sub>24</sub> H <sub>41</sub> O <sub>11</sub> ] <sup>-</sup> |       | 373 (C <sub>19</sub> H <sub>33</sub> O <sub>7</sub> ), 233<br>(C <sub>9</sub> H <sub>13</sub> O <sub>7</sub> ), 161<br>(C <sub>6</sub> H <sub>9</sub> O <sub>5</sub> ), 89<br>(C <sub>3</sub> H <sub>5</sub> O <sub>3</sub> )                                                                                                                   |          | Unknown diglycoside                                                                                                                                                      | -                                                      | -       |
| 18 | 21.89 | 465.2323 | n.d.                                                            |       | 333 (C <sub>16</sub> H <sub>29</sub> O <sub>7</sub> ), 233<br>(C <sub>9</sub> H <sub>13</sub> O <sub>7</sub> ), 161<br>(C <sub>6</sub> H <sub>9</sub> O <sub>5</sub> ), 113<br>(C <sub>5</sub> H <sub>5</sub> O <sub>3</sub> ), 101                                                                                                             | 218      | Unknown                                                                                                                                                                  |                                                        | -       |

|    |       |          |                                                                 |       |                                                                                                                                                                                                                                                                                                                                                                                                             |          |                                           |                                          |         |
|----|-------|----------|-----------------------------------------------------------------|-------|-------------------------------------------------------------------------------------------------------------------------------------------------------------------------------------------------------------------------------------------------------------------------------------------------------------------------------------------------------------------------------------------------------------|----------|-------------------------------------------|------------------------------------------|---------|
|    |       |          |                                                                 |       | (C <sub>4</sub> H <sub>5</sub> O <sub>3</sub> ), 89<br>(C <sub>3</sub> H <sub>5</sub> O <sub>3</sub> )                                                                                                                                                                                                                                                                                                      |          |                                           |                                          |         |
| 19 | 22.08 | 465.2332 | n.d.                                                            |       | 333 (C <sub>16</sub> H <sub>29</sub> O <sub>7</sub> ), 233<br>(C <sub>9</sub> H <sub>13</sub> O <sub>7</sub> ), 161<br>(C <sub>6</sub> H <sub>9</sub> O <sub>5</sub> ), 113<br>(C <sub>5</sub> H <sub>5</sub> O <sub>3</sub> ), 101<br>(C <sub>4</sub> H <sub>5</sub> O <sub>3</sub> ), 89<br>(C <sub>3</sub> H <sub>5</sub> O <sub>3</sub> )                                                               | 218      | Unknown, isomer of 18                     | -                                        | -       |
| 20 | 22.32 | 543.2047 | [C <sub>25</sub> H <sub>35</sub> O <sub>13</sub> ] <sup>-</sup> | -2.55 | 377 (C <sub>16</sub> H <sub>25</sub> O <sub>10</sub> ), 357<br>(C <sub>16</sub> H <sub>21</sub> O <sub>9</sub> ), 313<br>(C <sub>15</sub> H <sub>21</sub> O <sub>7</sub> ), 197<br>(C <sub>10</sub> H <sub>13</sub> O <sub>4</sub> ), 101<br>(C <sub>4</sub> H <sub>5</sub> O <sub>3</sub> )                                                                                                                |          | Dihydrooleuropein                         | RT, MS,<br>MSMS.<br>And ref <sup>d</sup> | Yes (4) |
|    |       | 623.2041 | [C <sub>22</sub> H <sub>39</sub> O <sub>20</sub> ] <sup>-</sup> | 1.21  | 461 (C <sub>16</sub> H <sub>29</sub> O <sub>15</sub> ), 179<br>(C <sub>9</sub> H <sub>7</sub> O <sub>4</sub> ), 161<br>(C <sub>9</sub> H <sub>5</sub> O <sub>3</sub> )                                                                                                                                                                                                                                      |          | Verbascoside isomer                       |                                          | Yes (2) |
| 21 | 22.73 | 701.2235 | [C <sub>31</sub> H <sub>41</sub> O <sub>18</sub> ] <sup>-</sup> | -5.92 | 377 (C <sub>19</sub> H <sub>21</sub> O <sub>8</sub> ), 307<br>(C <sub>15</sub> H <sub>15</sub> O <sub>7</sub> ), 275<br>(C <sub>15</sub> H <sub>15</sub> O <sub>5</sub> ), 221<br>(C <sub>8</sub> H <sub>13</sub> O <sub>7</sub> ), 179<br>(C <sub>6</sub> H <sub>11</sub> O <sub>6</sub> ), 149<br>(C <sub>8</sub> H <sub>5</sub> O <sub>3</sub> ), 101<br>(C <sub>4</sub> H <sub>5</sub> O <sub>3</sub> ) | 219      | Oleuropein glycoside isomer               | RT, MS,<br>MSMS.<br>And ref <sup>b</sup> | Yes (2) |
| 22 | 22.99 | 701.2213 | [C <sub>31</sub> H <sub>41</sub> O <sub>18</sub> ] <sup>-</sup> | -7.44 | 377 (C <sub>19</sub> H <sub>21</sub> O <sub>8</sub> ), 307<br>(C <sub>15</sub> H <sub>15</sub> O <sub>7</sub> ), 275<br>(C <sub>15</sub> H <sub>15</sub> O <sub>5</sub> ), 221<br>(C <sub>8</sub> H <sub>13</sub> O <sub>7</sub> ), 179<br>(C <sub>6</sub> H <sub>11</sub> O <sub>6</sub> ), 149<br>(C <sub>8</sub> H <sub>5</sub> O <sub>3</sub> ), 101<br>(C <sub>4</sub> H <sub>5</sub> O <sub>3</sub> ) | 219      | Oleuropein glycoside isomer               | RT, MS,<br>MSMS.<br>And ref <sup>b</sup> | Yes (2) |
| 23 | 23.01 | 447.0924 | [C <sub>21</sub> H <sub>19</sub> O <sub>11</sub> ] <sup>-</sup> | -0.91 | 285 (C <sub>15</sub> H <sub>9</sub> O <sub>6</sub> )                                                                                                                                                                                                                                                                                                                                                        | 328      | Luteolin glycoside isomer                 | By MSMS                                  | Yes (2) |
| 24 | 23.22 | 467.2479 | [C <sub>21</sub> H <sub>39</sub> O <sub>11</sub> ] <sup>-</sup> | -0.81 | 335 (C <sub>16</sub> H <sub>31</sub> O <sub>7</sub> ), 233<br>(C <sub>9</sub> H <sub>13</sub> O <sub>7</sub> ), 161<br>(C <sub>6</sub> H <sub>9</sub> O <sub>5</sub> ), 101<br>(C <sub>4</sub> H <sub>5</sub> O <sub>3</sub> ), 89<br>(C <sub>3</sub> H <sub>5</sub> O <sub>3</sub> )                                                                                                                       | 219      | Terpene diglycoside<br>(Putative)         | -                                        | -       |
| 25 | 23.32 | 551.1416 | [C <sub>21</sub> H <sub>27</sub> O <sub>14</sub> ] <sup>-</sup> | 1.94  | 161 (C <sub>9</sub> H <sub>5</sub> O <sub>3</sub> )                                                                                                                                                                                                                                                                                                                                                         | 219      | cinnamoyl hydroxyloganin<br>(PUTATIVE)    | Putative;                                |         |
|    |       | 701.2344 | [C <sub>21</sub> H <sub>39</sub> O <sub>11</sub> ] <sup>-</sup> | 5.70  | 539, 371 (C <sub>16</sub> H <sub>19</sub> O <sub>10</sub> ),<br>307 (C <sub>15</sub> H <sub>15</sub> O <sub>7</sub> ), 275<br>(C <sub>15</sub> H <sub>15</sub> O <sub>5</sub> ), 223                                                                                                                                                                                                                        | 220, 328 | Oleuropein-glucoside or<br>Aleuricine A/B |                                          |         |

|    |       |          |                                                                 |       |                                                                                                                                                                                                                                                                                                                                                                                                                                                                                                       |     |                                                        |                                          |         |
|----|-------|----------|-----------------------------------------------------------------|-------|-------------------------------------------------------------------------------------------------------------------------------------------------------------------------------------------------------------------------------------------------------------------------------------------------------------------------------------------------------------------------------------------------------------------------------------------------------------------------------------------------------|-----|--------------------------------------------------------|------------------------------------------|---------|
|    |       |          |                                                                 |       | (C <sub>11</sub> H <sub>11</sub> O <sub>5</sub> ), 179<br>(C <sub>6</sub> H <sub>11</sub> O <sub>6</sub> ), 149<br>(C <sub>8</sub> H <sub>5</sub> O <sub>3</sub> )                                                                                                                                                                                                                                                                                                                                    |     |                                                        |                                          |         |
| 26 | 23.43 | 381.1555 | [C <sub>19</sub> H <sub>25</sub> O <sub>8</sub> ] <sup>-</sup>  | 1.11  | 231 (C <sub>10</sub> H <sub>15</sub> O <sub>6</sub> ), 201<br>(C <sub>9</sub> H <sub>13</sub> O <sub>5</sub> ), 183<br>(C <sub>9</sub> H <sub>11</sub> O <sub>4</sub> ), 151<br>(C <sub>9</sub> H <sub>11</sub> O <sub>2</sub> ), 139<br>(C <sub>8</sub> H <sub>11</sub> O <sub>2</sub> )                                                                                                                                                                                                             |     | HT-ACDE.<br>(Hydroxytyrosylacyldihydro-<br>-elenolate) | RT, MS,<br>MSMS.                         | Yes (5) |
| 27 | 23.54 | 573.2135 | n.d.                                                            |       | 345 (C <sub>15</sub> H <sub>21</sub> O <sub>9</sub> ), 225<br>(C <sub>12</sub> H <sub>17</sub> O <sub>4</sub> ), 209<br>(C <sub>10</sub> H <sub>9</sub> O <sub>5</sub> ), 183<br>(C <sub>9</sub> H <sub>11</sub> O <sub>4</sub> ), 165<br>(C <sub>9</sub> H <sub>9</sub> O <sub>3</sub> ), 141<br>(C <sub>7</sub> H <sub>9</sub> O <sub>3</sub> ), 121<br>(C <sub>8</sub> H <sub>9</sub> O)                                                                                                           | 219 | Unknown                                                | -                                        | -       |
| 28 | 24.00 | 539.1771 | [C <sub>25</sub> H <sub>31</sub> O <sub>13</sub> ] <sup>-</sup> | 1.21  | 403 (C <sub>13</sub> H <sub>23</sub> O <sub>14</sub> ), 223<br>(C <sub>11</sub> H <sub>11</sub> O <sub>5</sub> ), 179<br>(C <sub>6</sub> H <sub>11</sub> O <sub>6</sub> ), 119<br>(C <sub>4</sub> H <sub>7</sub> O <sub>4</sub> ), 113<br>(C <sub>5</sub> H <sub>5</sub> O <sub>3</sub> ), 101<br>(C <sub>4</sub> H <sub>5</sub> O <sub>3</sub> ), 95 (C <sub>6</sub> H <sub>7</sub> O)                                                                                                               | 346 | Oleuroside isomer                                      | MS, MSMS                                 | -       |
| 29 | 24.10 | 549.2870 | n.d                                                             | 2.32  | 417 (C <sub>21</sub> H <sub>37</sub> O <sub>8</sub> ),<br>233(C <sub>9</sub> H <sub>13</sub> O <sub>7</sub> ), 161<br>(C <sub>6</sub> H <sub>9</sub> O <sub>5</sub> ).                                                                                                                                                                                                                                                                                                                                | 219 | Unknown                                                |                                          |         |
|    |       | 377.1241 | [C <sub>19</sub> H <sub>21</sub> O <sub>8</sub> ] <sup>-</sup>  | 0.96  | 307 (C <sub>15</sub> H <sub>15</sub> O <sub>7</sub> ), 275<br>(C <sub>14</sub> H <sub>11</sub> O <sub>6</sub> ), 149<br>(C <sub>8</sub> H <sub>5</sub> O <sub>3</sub> ), 139<br>(C <sub>7</sub> H <sub>7</sub> O <sub>3</sub> ), 127<br>(C <sub>6</sub> H <sub>7</sub> O <sub>3</sub> ), 111<br>(C <sub>5</sub> H <sub>3</sub> O <sub>3</sub> ), 111<br>(C <sub>5</sub> H <sub>3</sub> O <sub>3</sub> ), 101<br>(C <sub>4</sub> H <sub>5</sub> O <sub>3</sub> ), 95 (C <sub>6</sub> H <sub>7</sub> O) |     | Oleuropein aglycone isomer                             | RT, MS,<br>MSMS.<br>And ref <sup>b</sup> | Yes (2) |
| 30 | 24.29 | 569.1924 | [C <sub>26</sub> H <sub>33</sub> O <sub>14</sub> ] <sup>-</sup> | -4.11 | 537 (C <sub>25</sub> H <sub>29</sub> O <sub>13</sub> ) 403<br>(C <sub>17</sub> H <sub>23</sub> O <sub>11</sub> ), 371<br>(C <sub>16</sub> H <sub>19</sub> O <sub>10</sub> ), 305<br>(C <sub>15</sub> H <sub>13</sub> O <sub>7</sub> ), 223<br>(C <sub>11</sub> H <sub>11</sub> O <sub>5</sub> ), 151<br>(C <sub>8</sub> H <sub>7</sub> O <sub>3</sub> )                                                                                                                                               |     | Methoxyoleuropein                                      | RT, MS,<br>MSMS.<br>And ref <sup>b</sup> | Yes (2) |
|    |       | 527.2092 | [C <sub>25</sub> H <sub>35</sub> O <sub>12</sub> ] <sup>-</sup> | 4.72  | 377 (C <sub>16</sub> H <sub>25</sub> O <sub>10</sub> ), 313<br>(C <sub>15</sub> H <sub>21</sub> O <sub>7</sub> ),<br>101(C <sub>4</sub> H <sub>5</sub> O <sub>3</sub> )                                                                                                                                                                                                                                                                                                                               |     | Coumaroyl bearing<br>derivative                        | MSMS                                     |         |

|    |       |          |                                                                 |       |                                                                                                                                                                                                                                                                                                                                                                                                                                                                                                                                                                                                                                                          |          |                                   |                                    |         |
|----|-------|----------|-----------------------------------------------------------------|-------|----------------------------------------------------------------------------------------------------------------------------------------------------------------------------------------------------------------------------------------------------------------------------------------------------------------------------------------------------------------------------------------------------------------------------------------------------------------------------------------------------------------------------------------------------------------------------------------------------------------------------------------------------------|----------|-----------------------------------|------------------------------------|---------|
|    |       | 377.1241 |                                                                 |       | 307 (C <sub>15</sub> H <sub>15</sub> O <sub>7</sub> ), 275 (C <sub>14</sub> H <sub>11</sub> O <sub>6</sub> ), 197 (C <sub>10</sub> H <sub>13</sub> O <sub>4</sub> ), 165 (C <sub>9</sub> H <sub>9</sub> O <sub>3</sub> ), 149 (C <sub>8</sub> H <sub>5</sub> O <sub>3</sub> ), 139 (C <sub>7</sub> H <sub>7</sub> O <sub>3</sub> ), 121 (C <sub>8</sub> H <sub>9</sub> O), 111 (C <sub>5</sub> H <sub>3</sub> O <sub>3</sub> ), 111 (C <sub>5</sub> H <sub>3</sub> O <sub>3</sub> ), 101 (C <sub>4</sub> H <sub>5</sub> O <sub>3</sub> ), 95 (C <sub>6</sub> H <sub>7</sub> O)                                                                           |          | Oleuropein aglycone isomer        | RT, MS, MSMS. And ref <sup>b</sup> | Yes (2) |
| 31 | 24.61 | 539.1745 | [C <sub>25</sub> H <sub>31</sub> O <sub>13</sub> ] <sup>-</sup> | -1.44 | 403 (C <sub>13</sub> H <sub>23</sub> O <sub>14</sub> ), 371 (C <sub>16</sub> H <sub>19</sub> O <sub>10</sub> ), 307 (C <sub>8</sub> H <sub>19</sub> O <sub>12</sub> ), 275 (C <sub>15</sub> H <sub>15</sub> O <sub>5</sub> ), 223 (C <sub>11</sub> H <sub>11</sub> O <sub>5</sub> ), 179 (C <sub>6</sub> H <sub>11</sub> O <sub>6</sub> ), 149 (C <sub>8</sub> H <sub>5</sub> O <sub>3</sub> ), 119 (C <sub>4</sub> H <sub>7</sub> O <sub>4</sub> ), 101 (C <sub>4</sub> H <sub>5</sub> O <sub>3</sub> ), 95 (C <sub>6</sub> H <sub>7</sub> O)                                                                                                           | 222, 282 | Oleuropein                        | RT, MS, MSMS. And ref <sup>b</sup> | Yes (2) |
| 32 | 24.90 | 535.1430 | [C <sub>25</sub> H <sub>27</sub> O <sub>13</sub> ] <sup>-</sup> | -1.61 | 389 (C <sub>16</sub> H <sub>21</sub> O <sub>11</sub> ), 345 (C <sub>15</sub> H <sub>21</sub> O <sub>9</sub> ), 307 (C <sub>15</sub> H <sub>15</sub> O <sub>7</sub> ), 265 (C <sub>13</sub> H <sub>13</sub> O <sub>6</sub> ), 235 (C <sub>12</sub> H <sub>11</sub> O <sub>5</sub> ), 205 (C <sub>11</sub> H <sub>9</sub> O <sub>4</sub> ), 163 (C <sub>9</sub> H <sub>7</sub> O <sub>3</sub> ), 145 (C <sub>9</sub> H <sub>5</sub> O <sub>2</sub> ), 121 (C <sub>8</sub> H <sub>9</sub> O)                                                                                                                                                                | 219, 312 | 6'-(E)-p-coumaroyl-secologanoside | MS, MSMS                           | Yes (4) |
| 33 | 25.16 | 539.1730 | [C <sub>25</sub> H <sub>31</sub> O <sub>13</sub> ] <sup>-</sup> | 1.91  | 403 (C <sub>13</sub> H <sub>23</sub> O <sub>14</sub> ), 327 (C <sub>18</sub> H <sub>15</sub> O <sub>6</sub> ), 307 (C <sub>15</sub> H <sub>15</sub> O <sub>7</sub> ), 275 (C <sub>15</sub> H <sub>15</sub> O <sub>5</sub> ), 223 (C <sub>11</sub> H <sub>11</sub> O <sub>5</sub> ), 197 (C <sub>10</sub> H <sub>13</sub> O <sub>4</sub> ), 165 (C <sub>9</sub> H <sub>9</sub> O <sub>3</sub> ), 149 (C <sub>8</sub> H <sub>5</sub> O <sub>3</sub> ), 139 (C <sub>7</sub> H <sub>7</sub> O <sub>3</sub> ), 119 (C <sub>4</sub> H <sub>7</sub> O <sub>4</sub> ), 101 (C <sub>4</sub> H <sub>5</sub> O <sub>3</sub> ), 95 (C <sub>6</sub> H <sub>7</sub> O) | 219      | Oleuropein Isomer                 | RT, MS, MSMS. And ref <sup>b</sup> | Yes (2) |
| 34 | 25.35 | 565.1511 | [C <sub>26</sub> H <sub>29</sub> O <sub>14</sub> ] <sup>-</sup> | -4.04 | 345 (C <sub>15</sub> H <sub>21</sub> O <sub>9</sub> ), 295 (C <sub>14</sub> H <sub>15</sub> O <sub>7</sub> ), 235                                                                                                                                                                                                                                                                                                                                                                                                                                                                                                                                        | 220, 327 | Unknown                           | -                                  | -       |

|    |       |          |                                                                 |      |                                                                                                                                                                                                                                                                                                                                                                                                                                                                                                                                                                                                                                                                                                                                                   |          |                                    |                  |         |
|----|-------|----------|-----------------------------------------------------------------|------|---------------------------------------------------------------------------------------------------------------------------------------------------------------------------------------------------------------------------------------------------------------------------------------------------------------------------------------------------------------------------------------------------------------------------------------------------------------------------------------------------------------------------------------------------------------------------------------------------------------------------------------------------------------------------------------------------------------------------------------------------|----------|------------------------------------|------------------|---------|
|    |       |          |                                                                 |      | (C <sub>12</sub> H <sub>11</sub> O <sub>5</sub> ), 193<br>(C <sub>10</sub> H <sub>9</sub> O <sub>4</sub> ), 175<br>(C <sub>10</sub> H <sub>7</sub> O <sub>3</sub> ), 161<br>(C <sub>9</sub> H <sub>5</sub> O <sub>3</sub> )                                                                                                                                                                                                                                                                                                                                                                                                                                                                                                                       |          |                                    |                  |         |
| 35 | 25.62 | 539.1793 | [C <sub>25</sub> H <sub>31</sub> O <sub>13</sub> ] <sup>-</sup> | 3.35 | 403 (C <sub>13</sub> H <sub>23</sub> O <sub>14</sub> ), 371<br>(C <sub>16</sub> H <sub>19</sub> O <sub>10</sub> ), 327<br>(C <sub>18</sub> H <sub>15</sub> O <sub>6</sub> ), 307<br>(C <sub>15</sub> H <sub>15</sub> O <sub>7</sub> ), 275<br>(C <sub>15</sub> H <sub>15</sub> O <sub>5</sub> ), 223<br>(C <sub>11</sub> H <sub>11</sub> O <sub>5</sub> ), 197<br>(C <sub>10</sub> H <sub>13</sub> O <sub>4</sub> ), 165<br>(C <sub>9</sub> H <sub>0</sub> O <sub>3</sub> ), 149<br>(C <sub>8</sub> H <sub>5</sub> O <sub>3</sub> ), 139<br>(C <sub>7</sub> H <sub>7</sub> O <sub>3</sub> ), 119<br>(C <sub>4</sub> H <sub>7</sub> O <sub>4</sub> ), 101<br>(C <sub>4</sub> H <sub>5</sub> O <sub>3</sub> ), 95 (C <sub>6</sub> H <sub>7</sub> O) |          | Oleuroside Isomer                  | MS,MSMS          |         |
| 36 | 25.77 | 543.2459 | [C <sub>26</sub> H <sub>39</sub> O <sub>12</sub> ] <sup>-</sup> | 2.31 | 375 (C <sub>16</sub> H <sub>23</sub> O <sub>10</sub> ), 357<br>(C <sub>16</sub> H <sub>21</sub> O <sub>9</sub> ), 227<br>(C <sub>12</sub> H <sub>19</sub> O <sub>4</sub> ), 213<br>(C <sub>10</sub> H <sub>13</sub> O <sub>5</sub> ), 199<br>(C <sub>11</sub> H <sub>19</sub> O <sub>3</sub> ), 185<br>(C <sub>10</sub> H <sub>17</sub> O <sub>3</sub> ), 169<br>(C <sub>9</sub> H <sub>13</sub> O <sub>3</sub> ), 151<br>(C <sub>9</sub> H <sub>11</sub> O <sub>2</sub> ), 125<br>(C <sub>7</sub> H <sub>9</sub> O <sub>2</sub> ), 113<br>(C <sub>5</sub> H <sub>5</sub> O <sub>3</sub> )                                                                                                                                                        | 220      | Dihydro oleuropein                 | RT, MS,<br>MS-MS | Yes (2) |
| 37 | 25.99 | 535.1479 | [C <sub>25</sub> H <sub>27</sub> O <sub>13</sub> ] <sup>-</sup> | 3.33 | 389 (C <sub>16</sub> H <sub>21</sub> O <sub>11</sub> ), 345<br>(C <sub>15</sub> H <sub>21</sub> O <sub>9</sub> ), 307<br>(C <sub>15</sub> H <sub>15</sub> O <sub>7</sub> ), 265<br>(C <sub>13</sub> H <sub>13</sub> O <sub>6</sub> ), 235<br>(C <sub>12</sub> H <sub>11</sub> O <sub>5</sub> ), 205<br>(C <sub>11</sub> H <sub>9</sub> O <sub>4</sub> ), 163<br>(C <sub>9</sub> H <sub>7</sub> O <sub>3</sub> ), 145<br>(C <sub>9</sub> H <sub>5</sub> O <sub>2</sub> ), 121<br>(C <sub>8</sub> H <sub>9</sub> O)                                                                                                                                                                                                                                 | 220, 300 | Coumaroyl-secologanoside<br>isomer | MS. MS-<br>MS    |         |
| 38 | 26.30 | 377.1243 | [C <sub>19</sub> H <sub>21</sub> O <sub>8</sub> ] <sup>-</sup>  | 0.29 | 307 (C <sub>15</sub> H <sub>15</sub> O <sub>7</sub> ), 275<br>(C <sub>14</sub> H <sub>11</sub> O <sub>6</sub> ), 171<br>(C <sub>7</sub> H <sub>7</sub> O <sub>5</sub> ), 149<br>(C <sub>8</sub> H <sub>5</sub> O <sub>3</sub> ), 139<br>(C <sub>7</sub> H <sub>7</sub> O <sub>3</sub> ), 127<br>(C <sub>6</sub> H <sub>7</sub> O <sub>3</sub> ), 113<br>(C <sub>5</sub> H <sub>5</sub> O <sub>3</sub> ) 111                                                                                                                                                                                                                                                                                                                                       | 220, 286 | Isomer of oleuropein<br>aglycone   | MSMS             |         |

|    |       |          |                                                                 |       |                                                                                                                                                                                                                                                                                                                                                                                                                                                                                                                                                                           |          |                                  |                                         |         |
|----|-------|----------|-----------------------------------------------------------------|-------|---------------------------------------------------------------------------------------------------------------------------------------------------------------------------------------------------------------------------------------------------------------------------------------------------------------------------------------------------------------------------------------------------------------------------------------------------------------------------------------------------------------------------------------------------------------------------|----------|----------------------------------|-----------------------------------------|---------|
|    |       |          |                                                                 |       | (C <sub>5</sub> H <sub>3</sub> O <sub>3</sub> ), 101<br>(C <sub>4</sub> H <sub>5</sub> O <sub>3</sub> ), 95 (C <sub>6</sub> H <sub>7</sub> O)                                                                                                                                                                                                                                                                                                                                                                                                                             |          |                                  |                                         |         |
| 39 | 26.60 | 523.1780 | [C <sub>25</sub> H <sub>31</sub> O <sub>12</sub> ] <sup>-</sup> | 3.12  | 361 (C <sub>19</sub> H <sub>21</sub> O <sub>7</sub> ), 291<br>(C <sub>15</sub> H <sub>15</sub> O <sub>6</sub> ), 259<br>(C <sub>15</sub> H <sub>15</sub> O <sub>4</sub> ), 101<br>(C <sub>4</sub> H <sub>5</sub> O <sub>3</sub> )                                                                                                                                                                                                                                                                                                                                         | 220, 276 | Ligstroside (or isomer)          | MSMS                                    | Yes (6) |
| 40 | 27.00 | 555.2100 | [C <sub>26</sub> H <sub>35</sub> O <sub>13</sub> ] <sup>-</sup> | 2.74  | 511 (C <sub>25</sub> H <sub>35</sub> O <sub>11</sub> ) 345<br>(C <sub>15</sub> H <sub>21</sub> O <sub>9</sub> ), 327<br>(C <sub>15</sub> H <sub>19</sub> O <sub>8</sub> ), 225<br>(C <sub>12</sub> H <sub>17</sub> O <sub>4</sub> ), 197<br>(C <sub>11</sub> H <sub>17</sub> O <sub>3</sub> ), 183<br>(C <sub>10</sub> H <sub>15</sub> O <sub>3</sub> ), 165<br>(C <sub>9</sub> H <sub>9</sub> O <sub>3</sub> ), 155<br>(C <sub>5</sub> H <sub>5</sub> O <sub>3</sub> ), 139<br>(C <sub>6</sub> H <sub>3</sub> O <sub>4</sub> ), 121<br>(C <sub>8</sub> H <sub>9</sub> O) | 220      | Hydroxyoleurosides               | RT, MS,<br>MSMS and<br>ref <sup>b</sup> | Yes (2) |
| 41 | 27.15 | 493.1330 | [C <sub>23</sub> H <sub>25</sub> O <sub>12</sub> ] <sup>-</sup> | -1.04 | 327 (C <sub>15</sub> H <sub>19</sub> O <sub>8</sub> ), 209<br>(C <sub>10</sub> H <sub>9</sub> O <sub>5</sub> ), 183<br>(C <sub>9</sub> H <sub>11</sub> O <sub>4</sub> ), 165<br>(C <sub>9</sub> H <sub>9</sub> O <sub>3</sub> ), 135<br>(C <sub>8</sub> H <sub>7</sub> O <sub>2</sub> ), 121<br>(C <sub>7</sub> H <sub>5</sub> O <sub>2</sub> )                                                                                                                                                                                                                           | 220      | Unknown                          |                                         |         |
| 42 | 27.46 | 555.2040 | [C <sub>26</sub> H <sub>35</sub> O <sub>13</sub> ] <sup>-</sup> | -3.20 | 345 (C <sub>15</sub> H <sub>21</sub> O <sub>9</sub> ), 327<br>(C <sub>15</sub> H <sub>19</sub> O <sub>8</sub> ), 225<br>(C <sub>12</sub> H <sub>17</sub> O <sub>4</sub> ), 197<br>(C <sub>11</sub> H <sub>17</sub> O <sub>3</sub> ), 183<br>(C <sub>10</sub> H <sub>15</sub> O <sub>3</sub> ), 165<br>(C <sub>9</sub> H <sub>9</sub> O <sub>3</sub> ), 155<br>(C <sub>5</sub> H <sub>5</sub> O <sub>3</sub> ), 139<br>(C <sub>6</sub> H <sub>3</sub> O <sub>4</sub> ), 121<br>(C <sub>8</sub> H <sub>9</sub> O)                                                           | 220      | Hydroxyoleurosides isomer        | MS, MSMS                                |         |
| 43 | 27.70 | 377.1243 | [C <sub>19</sub> H <sub>21</sub> O <sub>8</sub> ] <sup>-</sup>  | 0.21  | 307 (C <sub>15</sub> H <sub>15</sub> O <sub>7</sub> ), 275<br>(C <sub>14</sub> H <sub>11</sub> O <sub>6</sub> ), 191<br>(C <sub>10</sub> H <sub>7</sub> O <sub>4</sub> ), 171<br>(C <sub>7</sub> H <sub>7</sub> O <sub>5</sub> ), 149<br>(C <sub>8</sub> H <sub>5</sub> O <sub>3</sub> ), 139<br>(C <sub>7</sub> H <sub>7</sub> O <sub>3</sub> ), 127<br>(C <sub>6</sub> H <sub>7</sub> O <sub>3</sub> ), 111<br>(C <sub>5</sub> H <sub>3</sub> O <sub>3</sub> ), 101<br>(C <sub>4</sub> H <sub>5</sub> O <sub>3</sub> ), 95 (C <sub>6</sub> H <sub>7</sub> O)            | 220      | Isomer of oleuropein<br>aglycone | RT, MS,<br>MSMS and<br>ref <sup>b</sup> | Yes (2) |
| 44 | 28.10 | 461.2013 | [C <sub>21</sub> H <sub>33</sub> O <sub>11</sub> ] <sup>-</sup> | -0.43 | 167 (C <sub>10</sub> H <sub>15</sub> O <sub>2</sub> )                                                                                                                                                                                                                                                                                                                                                                                                                                                                                                                     |          | Unknown                          | -                                       | -       |

|    |       |          |                                                                 |       |                                                                                                                                                                                                                                                                                                                                                                                                                                                                                                                                             |      |                                                             |                                   |         |
|----|-------|----------|-----------------------------------------------------------------|-------|---------------------------------------------------------------------------------------------------------------------------------------------------------------------------------------------------------------------------------------------------------------------------------------------------------------------------------------------------------------------------------------------------------------------------------------------------------------------------------------------------------------------------------------------|------|-------------------------------------------------------------|-----------------------------------|---------|
| 45 | 28.14 | 393.1191 | [C <sub>19</sub> H <sub>21</sub> O <sub>9</sub> ] <sup>-</sup>  | 1.05  | 317 (C <sub>17</sub> H <sub>17</sub> O <sub>6</sub> ), 181 (C <sub>9</sub> H <sub>9</sub> O <sub>4</sub> ), 137 (C <sub>8</sub> H <sub>9</sub> O <sub>2</sub> )                                                                                                                                                                                                                                                                                                                                                                             | 220  | Hydroxyoleuropein aglycone                                  | Putative from MSMS data           | -       |
| 46 | 28.29 | 557.2192 | [C <sub>26</sub> H <sub>37</sub> O <sub>13</sub> ] <sup>-</sup> | -3.68 | 345 (C <sub>15</sub> H <sub>21</sub> O <sub>9</sub> ), 227 (C <sub>12</sub> H <sub>19</sub> O <sub>4</sub> ), 199 (C <sub>11</sub> H <sub>19</sub> O <sub>3</sub> ), 185 (C <sub>10</sub> H <sub>17</sub> O <sub>3</sub> ), 165 (C <sub>9</sub> H <sub>9</sub> O <sub>3</sub> ), 139 (C <sub>6</sub> H <sub>3</sub> O <sub>4</sub> ), 121 (C <sub>8</sub> H <sub>9</sub> O)                                                                                                                                                                 | 220, | 6'-O-[(2E)-2,6-dimethyl-8-hydroxy-2-octenoyl]secologanoside | MSMS data                         | Yes (4) |
| 47 | 29.95 | 545.2563 | n.d.                                                            | -     | -                                                                                                                                                                                                                                                                                                                                                                                                                                                                                                                                           | -    | Unknown                                                     | -                                 | -       |
| 48 | 30.08 | 377.1242 | [C <sub>19</sub> H <sub>21</sub> O <sub>8</sub> ] <sup>-</sup>  | 1.10  | 307 (C <sub>15</sub> H <sub>15</sub> O <sub>7</sub> ), 275 (C <sub>14</sub> H <sub>11</sub> O <sub>6</sub> ), 191 (C <sub>10</sub> H <sub>7</sub> O <sub>4</sub> ), 171 (C <sub>7</sub> H <sub>7</sub> O <sub>5</sub> ), 149 (C <sub>8</sub> H <sub>5</sub> O <sub>3</sub> ), 139 (C <sub>7</sub> H <sub>7</sub> O <sub>3</sub> ), 127 (C <sub>6</sub> H <sub>7</sub> O <sub>3</sub> ), 111 (C <sub>5</sub> H <sub>3</sub> O <sub>3</sub> ), 101 (C <sub>4</sub> H <sub>5</sub> O <sub>3</sub> ), 95 (C <sub>6</sub> H <sub>7</sub> O)      |      | Oleuropein aglycone                                         | RT, MS, MSMS and ref <sup>b</sup> | Yes (2) |
| 49 | 31.19 | 377.1243 | [C <sub>19</sub> H <sub>21</sub> O <sub>8</sub> ] <sup>-</sup>  | 0.24  | 307 (C <sub>15</sub> H <sub>15</sub> O <sub>7</sub> ), 275 (C <sub>14</sub> H <sub>11</sub> O <sub>6</sub> ), 191 (C <sub>10</sub> H <sub>7</sub> O <sub>4</sub> ), 171 (C <sub>7</sub> H <sub>7</sub> O <sub>5</sub> ), 149 (C <sub>8</sub> H <sub>5</sub> O <sub>3</sub> ), 139 (C <sub>7</sub> H <sub>7</sub> O <sub>3</sub> ), 127 (C <sub>6</sub> H <sub>7</sub> O <sub>3</sub> ), 111 (C <sub>5</sub> H <sub>3</sub> O <sub>3</sub> ), 101 (C <sub>4</sub> H <sub>5</sub> O <sub>3</sub> ), 95 (C <sub>6</sub> H <sub>7</sub> O)      |      | Isomer of oleuropein aglycone                               | MSMS data                         |         |
| 50 | 32.21 | 943.3442 | [C <sub>43</sub> H <sub>59</sub> O <sub>23</sub> ] <sup>-</sup> | 0.05  | 513 (C <sub>35</sub> H <sub>29</sub> O <sub>4</sub> ), 345 (C <sub>15</sub> H <sub>21</sub> O <sub>9</sub> ), 227 (C <sub>12</sub> H <sub>19</sub> O <sub>4</sub> ), 209 (C <sub>10</sub> H <sub>9</sub> O <sub>5</sub> ), 185 (C <sub>10</sub> H <sub>17</sub> O <sub>3</sub> ), 165 (C <sub>9</sub> H <sub>9</sub> O <sub>3</sub> ), 149 (C <sub>8</sub> H <sub>5</sub> O <sub>3</sub> ), 139 (C <sub>6</sub> H <sub>3</sub> O <sub>4</sub> ), 121 (C <sub>8</sub> H <sub>9</sub> O), 101 (C <sub>4</sub> H <sub>5</sub> O <sub>3</sub> ) | 222  | Unknown                                                     | -                                 | -       |

**Table. S3.** Major compounds identified in fractions from the Koroneiki extract

| Nr | Fraction | Major compounds                                        |
|----|----------|--------------------------------------------------------|
| 1  | 5        | Hydroxytyrosol, Hydroxytyrosol glucoside, and Oleoside |
| 2  | 6        | Acyclodihydroelenolic acid glucoside isomer, Loganin   |
| 3  | 17       | Rutin                                                  |
| 4  | 18       | Verbascoside                                           |
| 5  | 19       | Dihydro oleuropein                                     |
| 6  | 20       | Oleuropein glucoside                                   |
| 7  | 21       | Oleuropein                                             |
| 8  | 22       | Oleuropein and Coumaroyl-secloganoside                 |
| 9  | 23       | Dimethyl- Hydroxyoctenoyl-secologanoside               |
| 10 | 24       | Hydroxyoleuropein aglycone, Oleuropein aglycone        |
| 11 | 25       | Oleuropein aglycone                                    |
| 12 | 26       | Oleuropein aglycone                                    |

### References

1. Maalej, A., Bouallagui, Z., Hadrich, F., Isoda, H., and Sayadi, S. (2017) Assessment of *Olea europaea* L. fruit extracts: Phytochemical characterization and anticancer pathway investigation. *Biomedicine & Pharmacotherapy* **90**, 179–186
2. Michel, T., Khlif, I., Kanakis, P., Termentzi, A., Allouche, N., Halabalaki, M., and Skaltsounis, A.-L. (2015) UHPLC-DAD-FLD and UHPLC-HRMS/MS based metabolic profiling and characterization of different *Olea europaea* organs of Koroneiki and Chetoui varieties. *Phytochemistry Letters* **11**, 424–439
3. Rubio-Senent, F., Martos, S., Lama-Muñoz, A., Fernández-Bolaños, J. G., Rodríguez-Gutiérrez, G., and Fernández-Bolaños, J. (2015) Isolation and identification of minor secoiridoids and phenolic components from thermally treated olive oil by-products. *Food chemistry* **187**, 166–173
4. Obied, H. K., Prenzler, P. D., Ryan, D., Servili, M., Taticchi, A., Esposto, S., and Robards, K. (2008) Biosynthesis and biotransformations of phenol-conjugated oleosidic secoiridoids from *Olea europaea* L. *Natural product reports* **25**, 1167–1179
5. Obied, H. K., Karuso, P., Prenzler, P. D., and Robards, K. (2007) Novel secoiridoids with antioxidant activity from Australian olive mill waste. *Journal of agricultural and food chemistry* **55**, 2848–2853
6. Gariboldi, P., Jommi, G., and Verotta, L. (1986) Secoiridoids from *Olea europaea*. *Phytochemistry* **25**, 865–869
